# Supplementary material for: The rate and potential relevance of new mutations in a colonizing plant lineage
Source: PubMed Central journal article supplement (PMC5825158; doi:10.1371/journal.pgen.1007155), 2018-02-12

GR\_rootLength

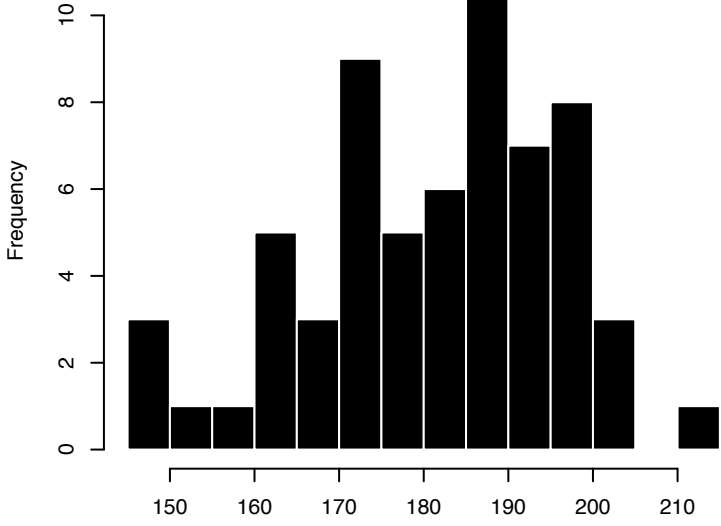

lambda 0.983

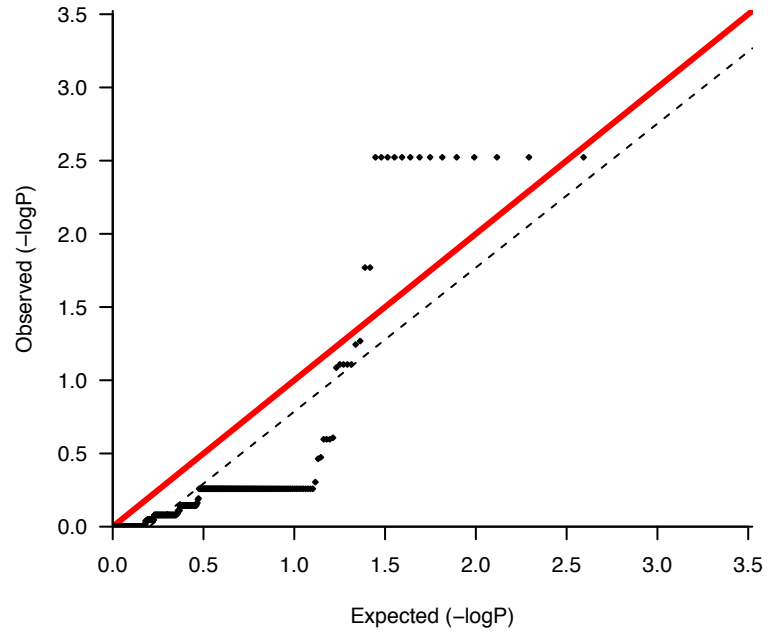

GR\_shootArea

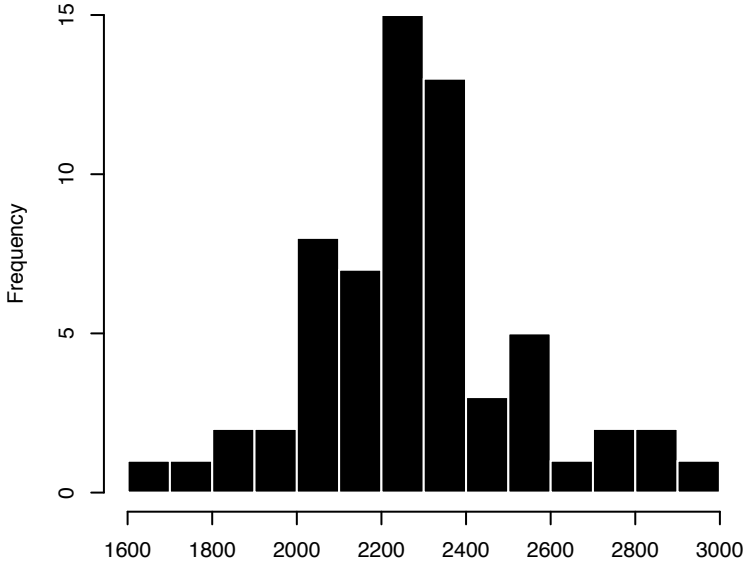

lambda 1.383

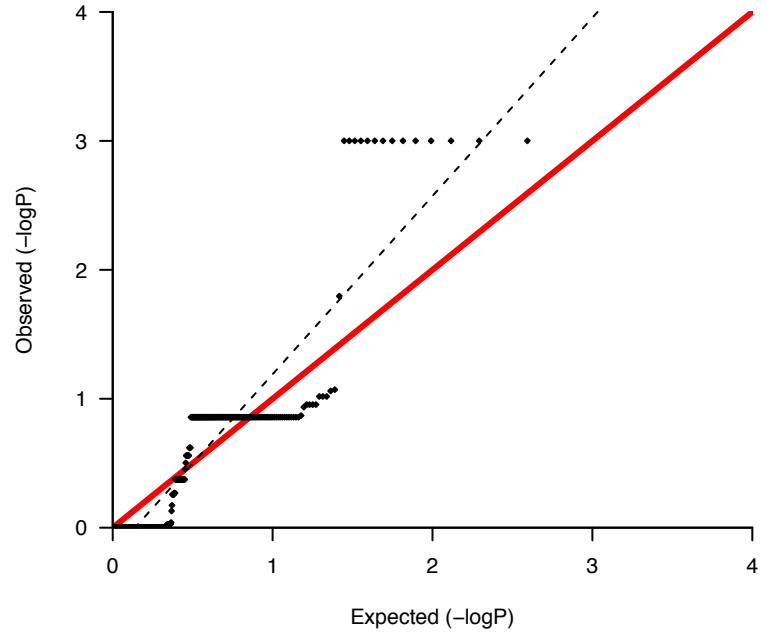

rootLength

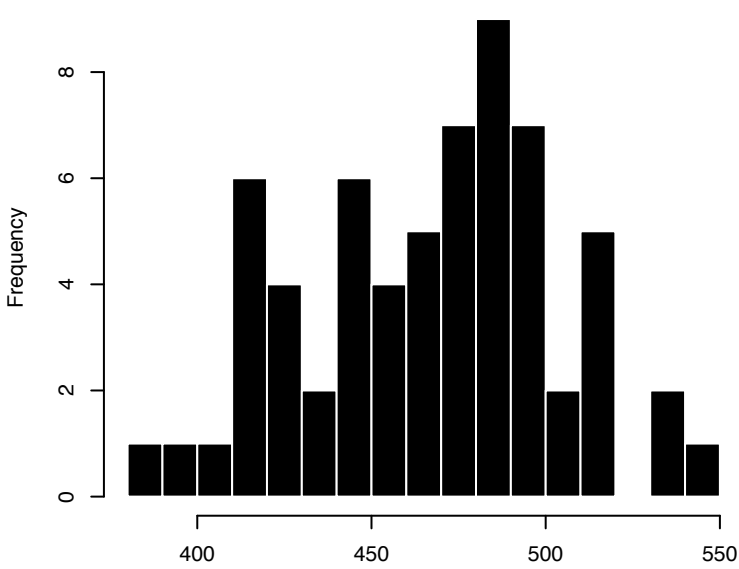

lambda 0.244

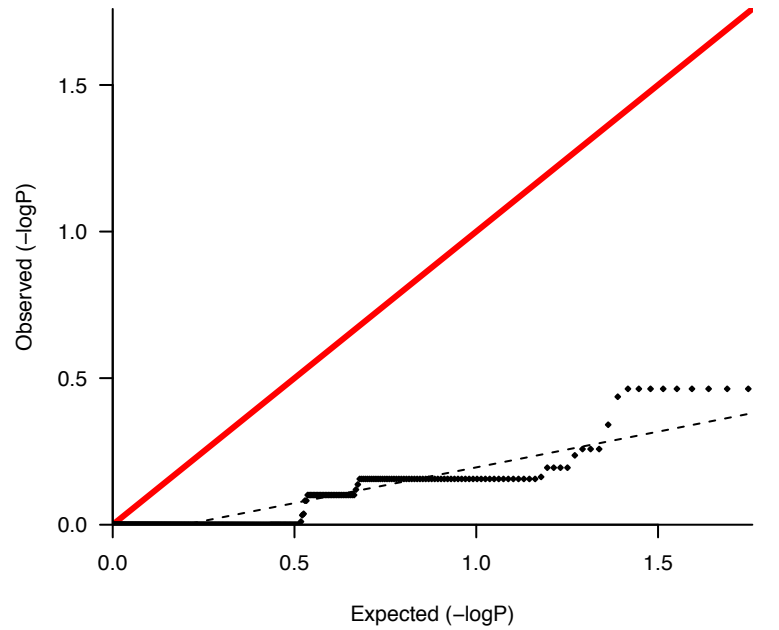

**dirEquivalent**

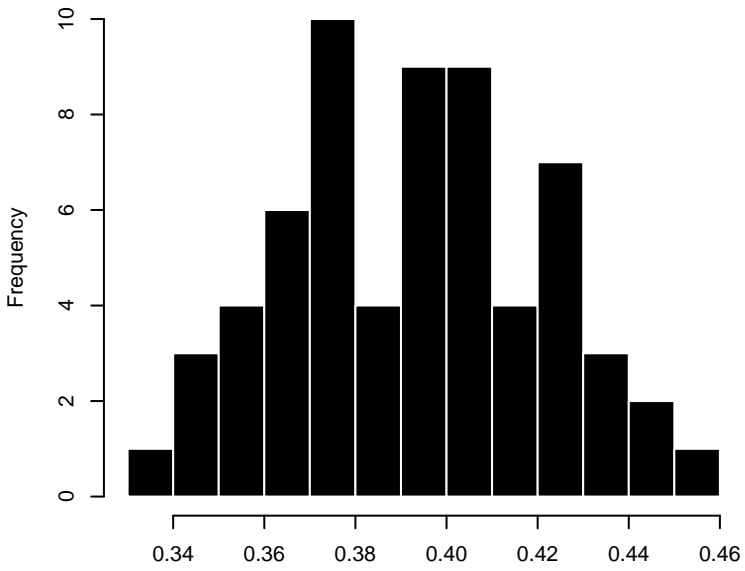

**lambda 1.355**

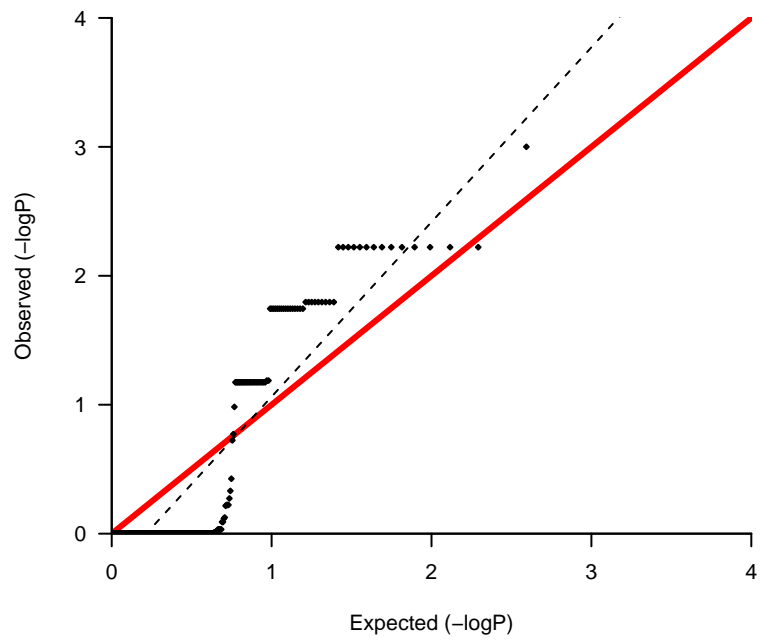

**stdDevXY**

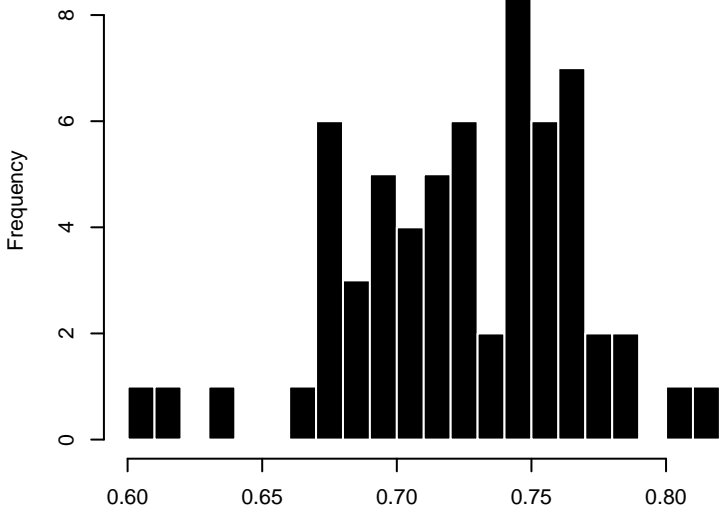

**lambda 0.481**

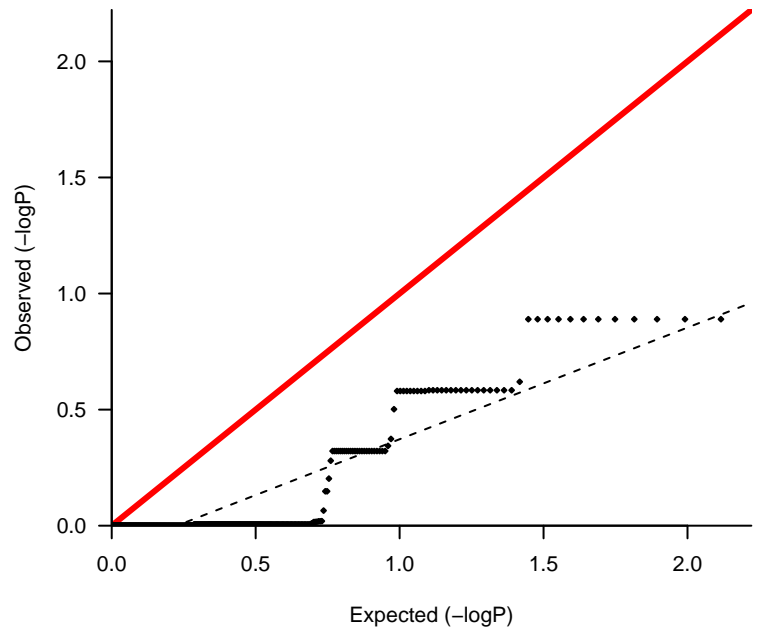

**meanRootWidth**

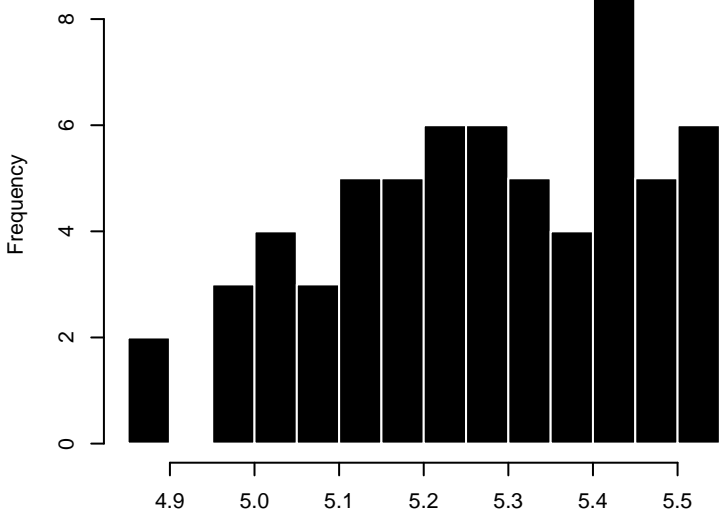

**lambda 0.054**

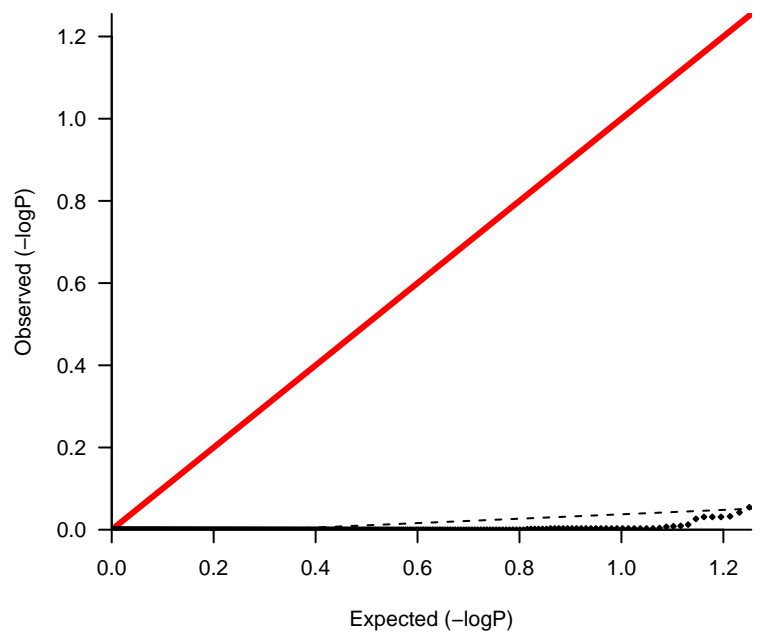

**rootWidth20**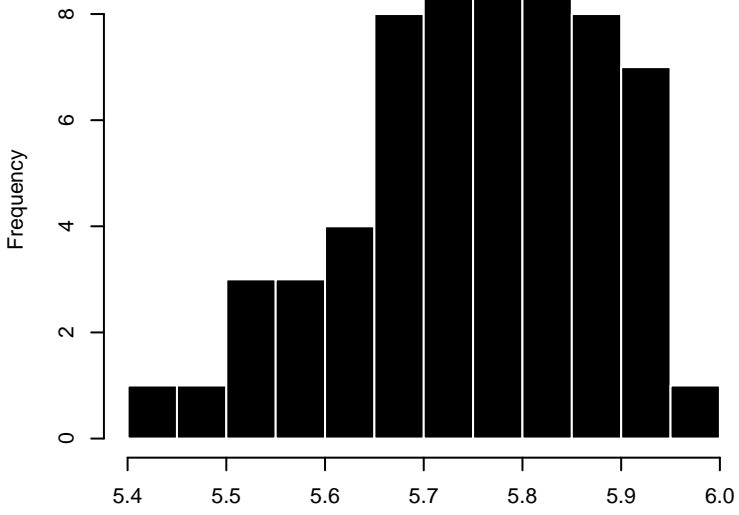**lambda 0.002**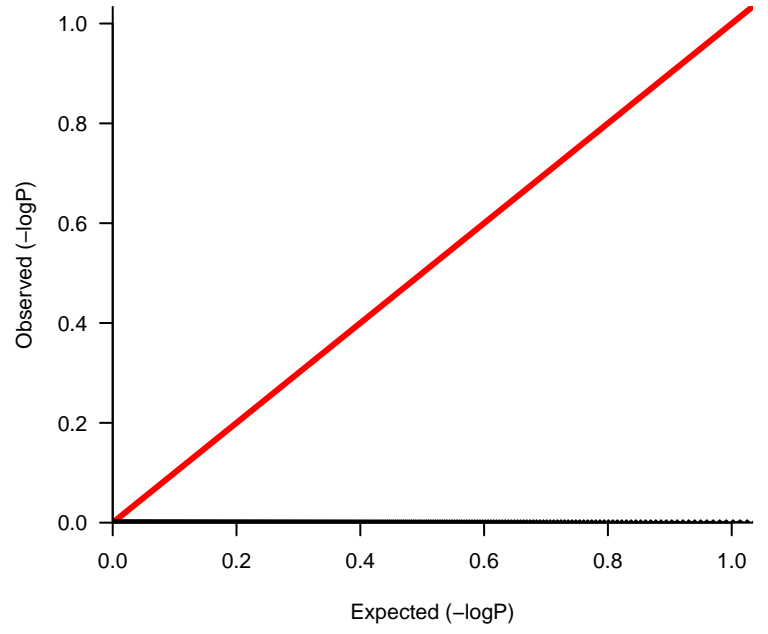**rootWidth40**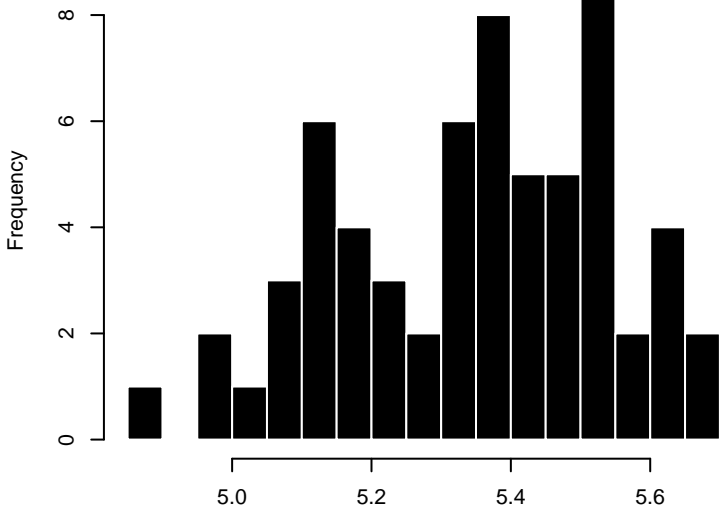**lambda 0.059**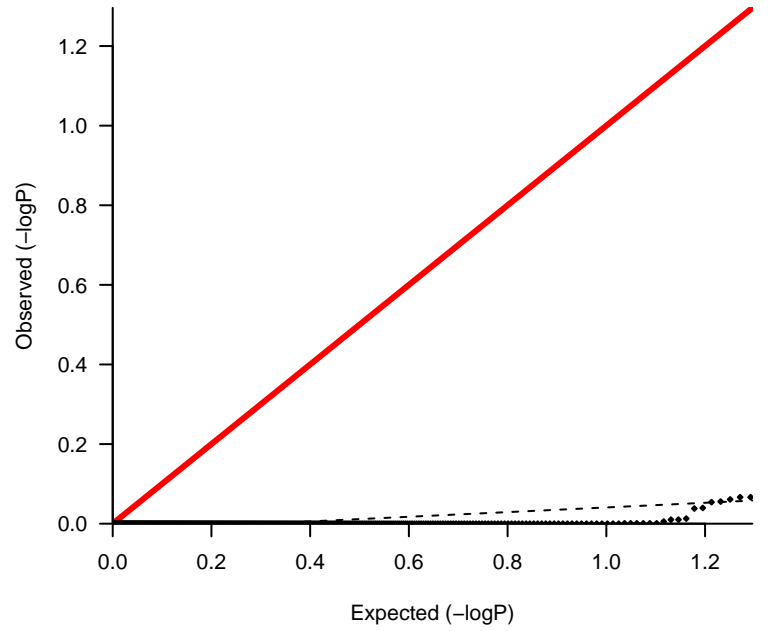**rootWidth60**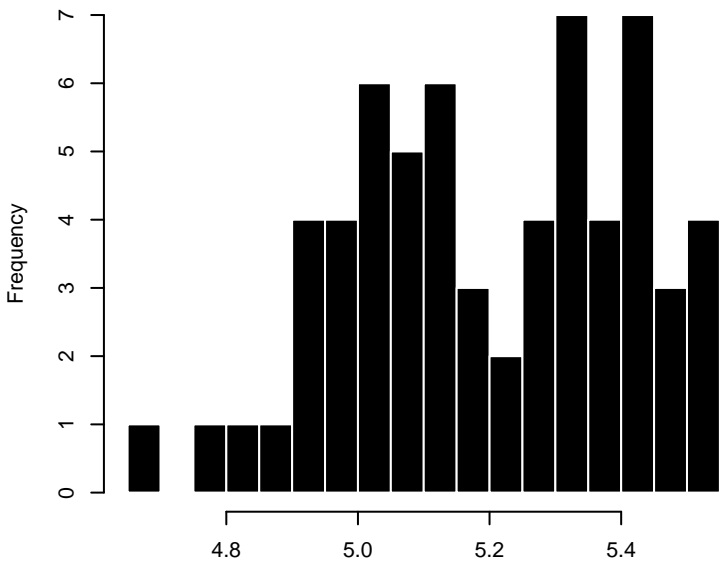**lambda 0.089**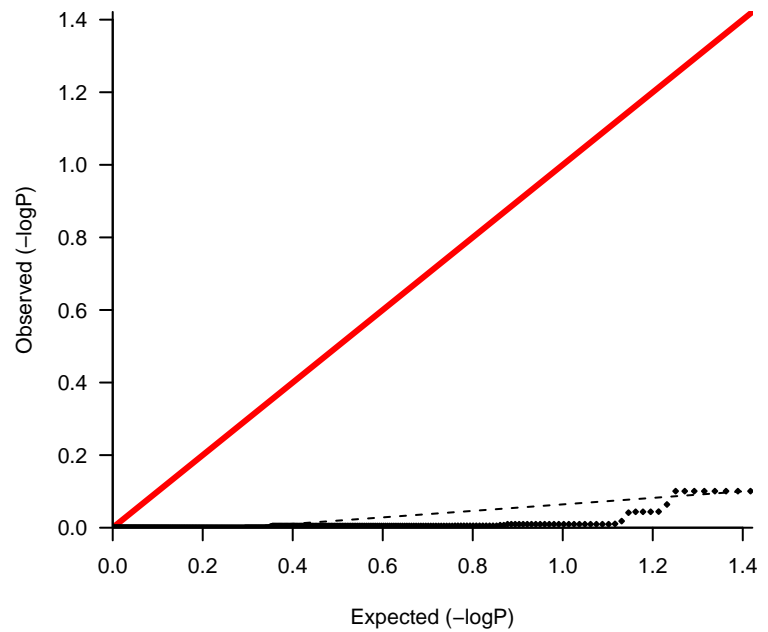

**rootWidth80**

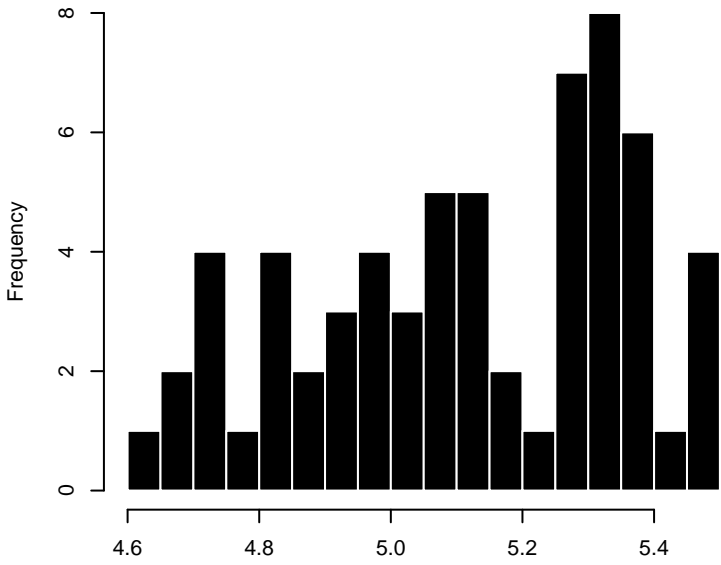

**lambda 0.068**

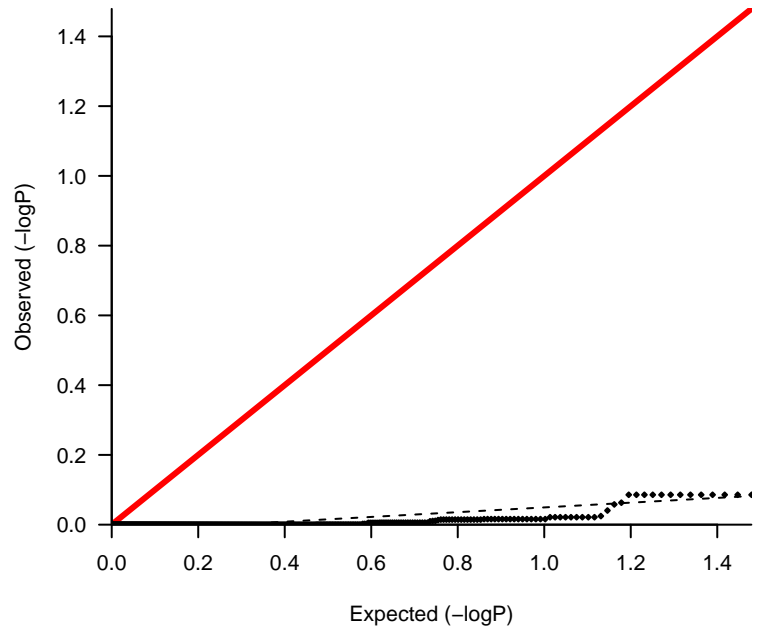

**rootWidth100**

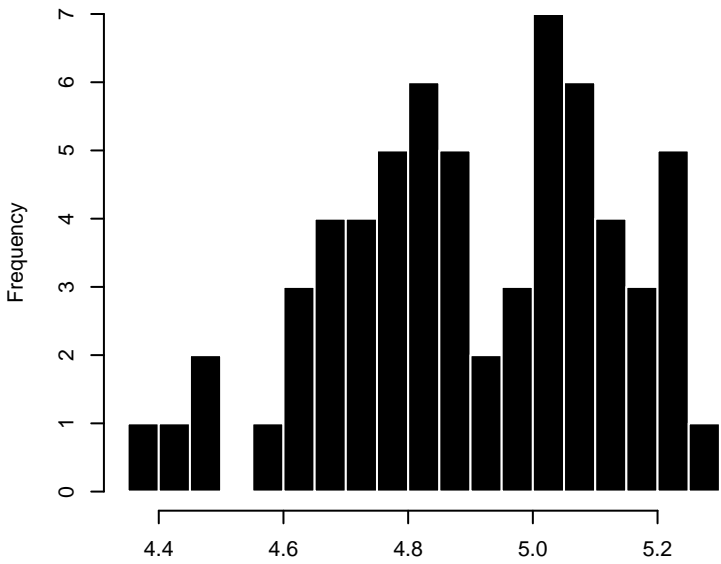

**lambda 0.04**

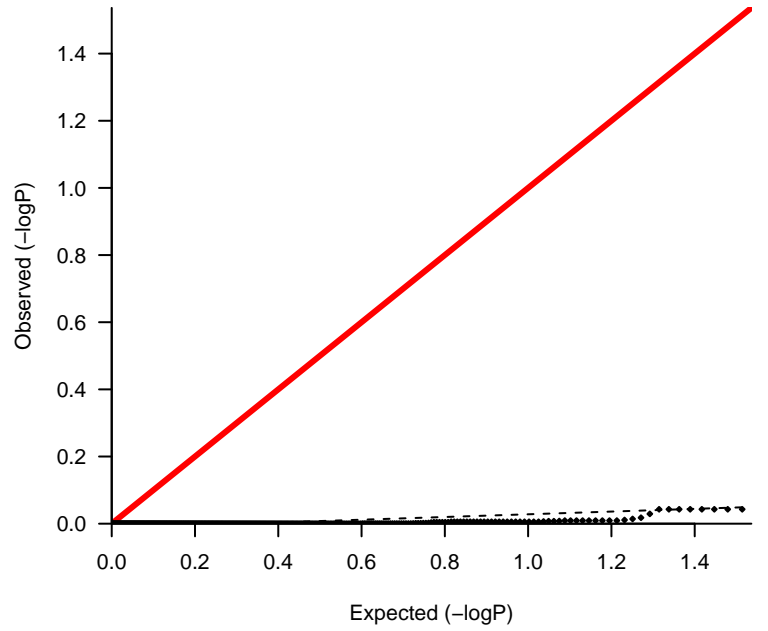

**gravitropicDir**

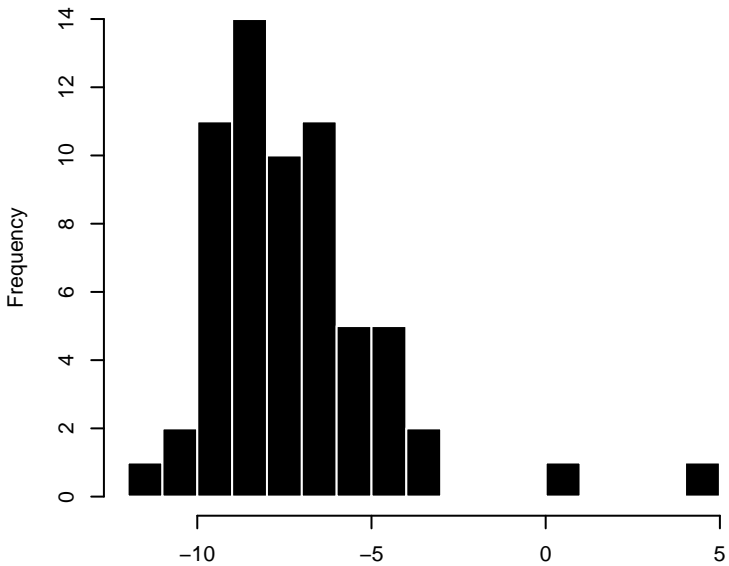

**lambda 0.059**

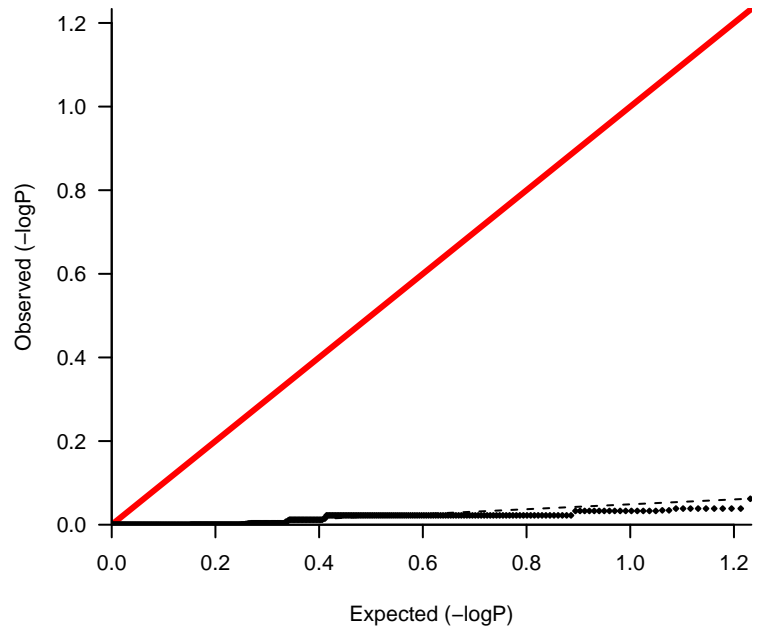

**gravitropicScore**

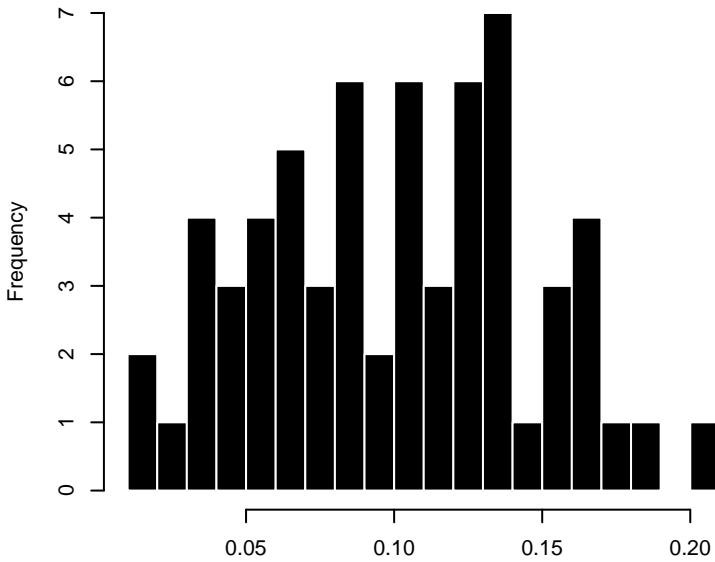

**lambda 0.478**

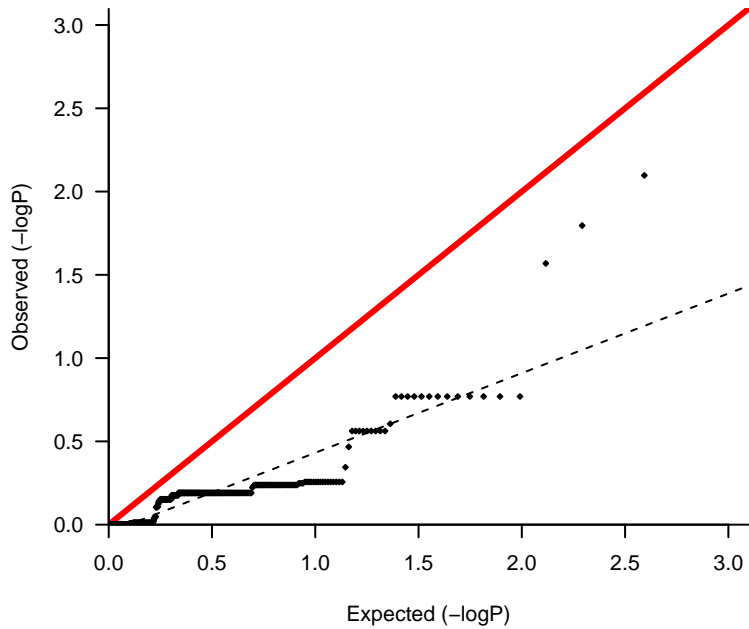

**TotLen.EucLen**

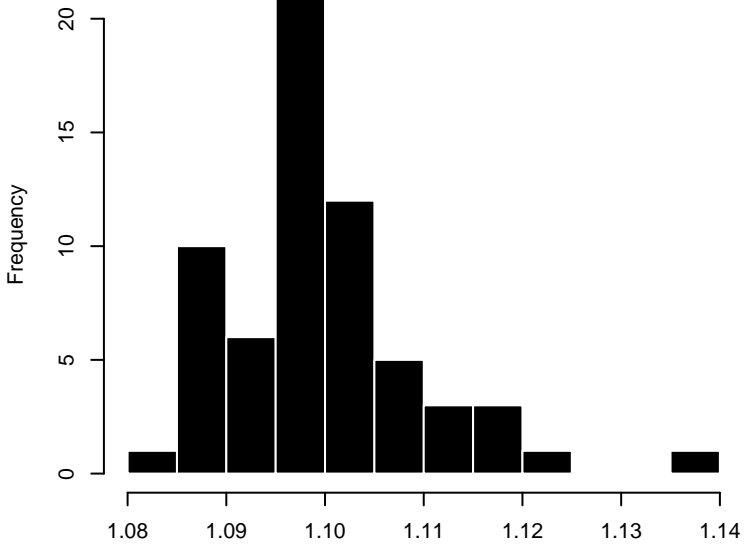

**lambda 0.685**

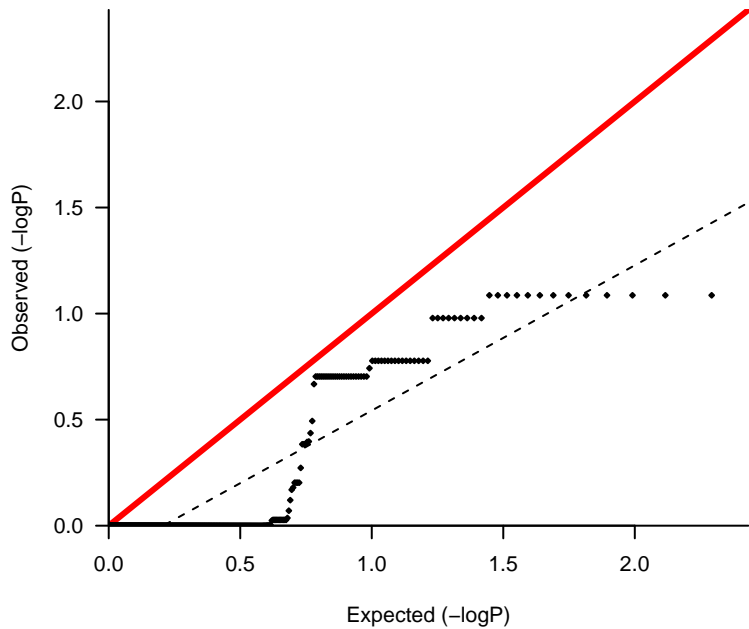

**GR.TL**

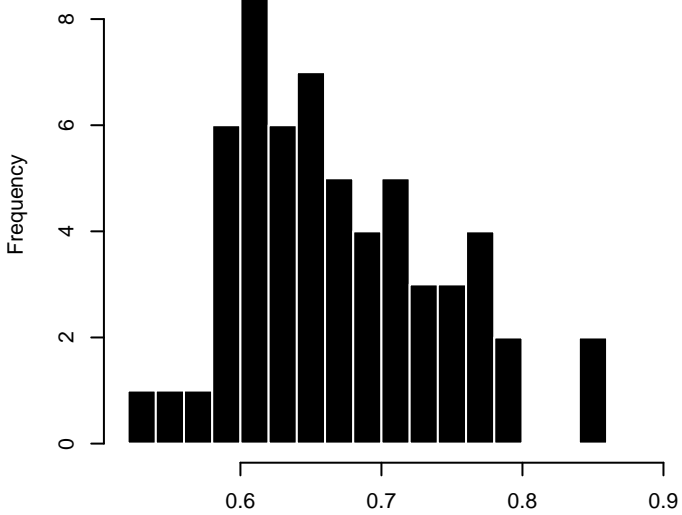

**lambda 0.036**

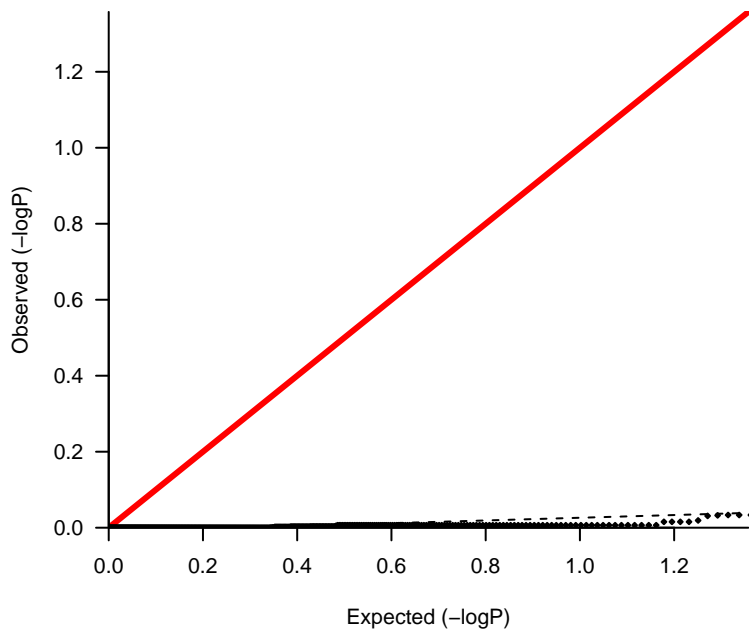

**seed\_size**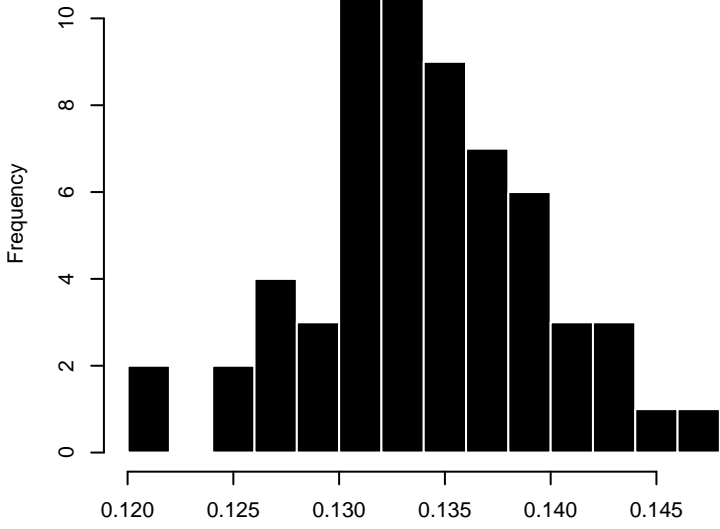**lambda 0.279**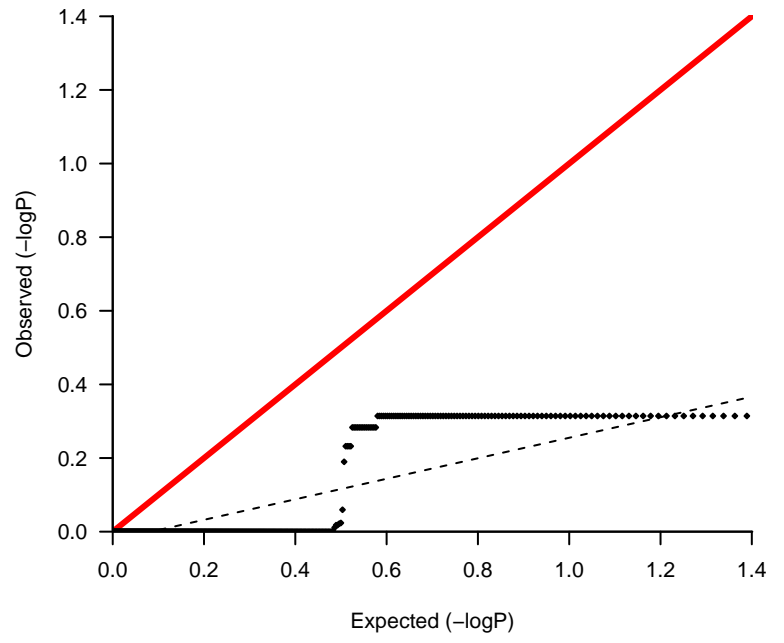**FT\_V0**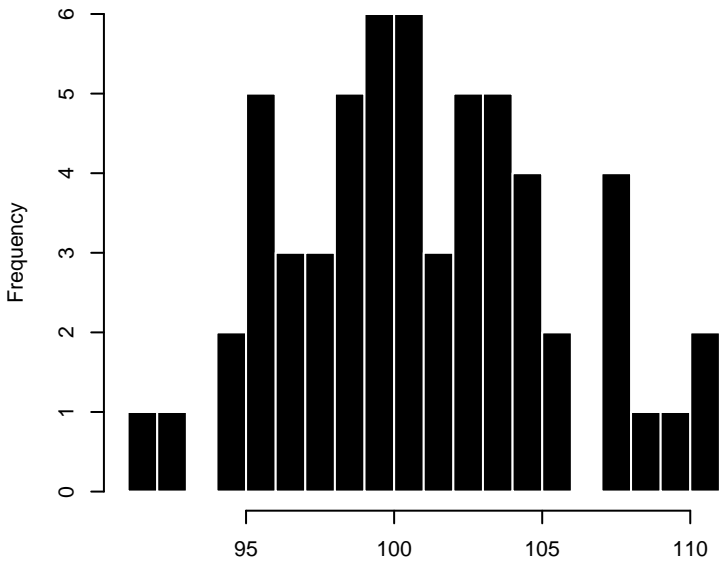**lambda 0.012**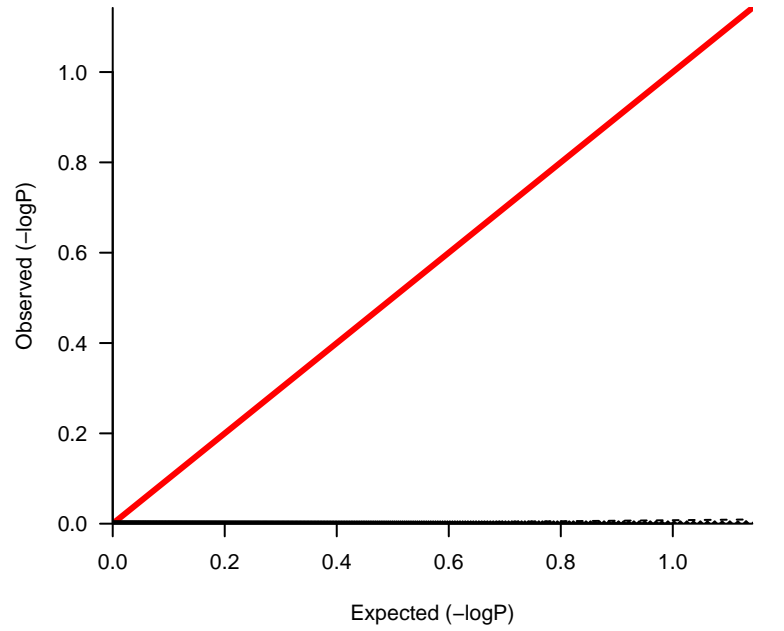**FT\_V1**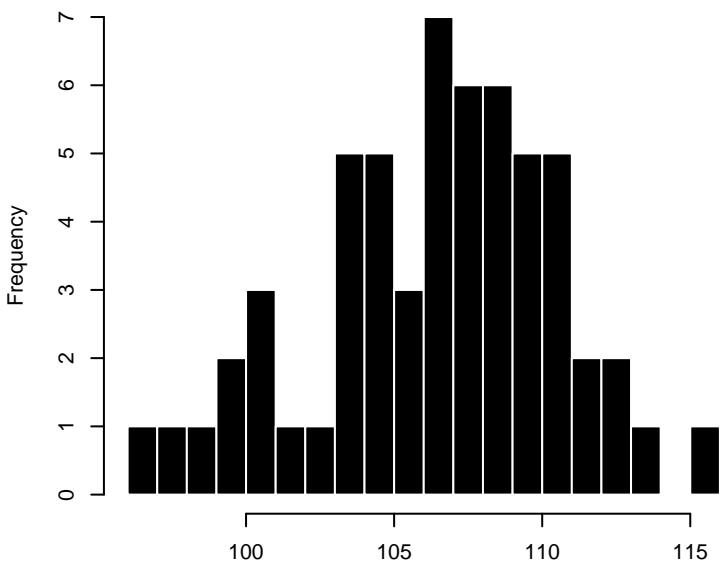**lambda 0.434**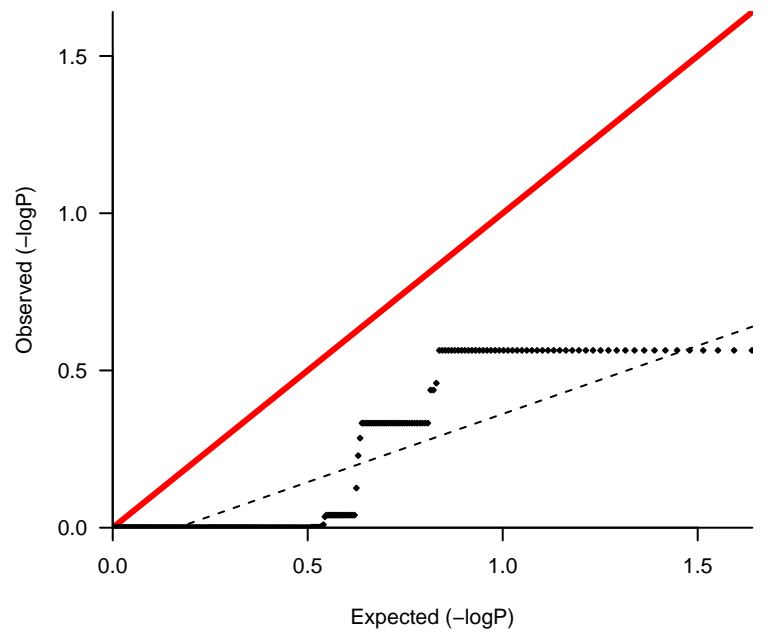

**FT\_V2**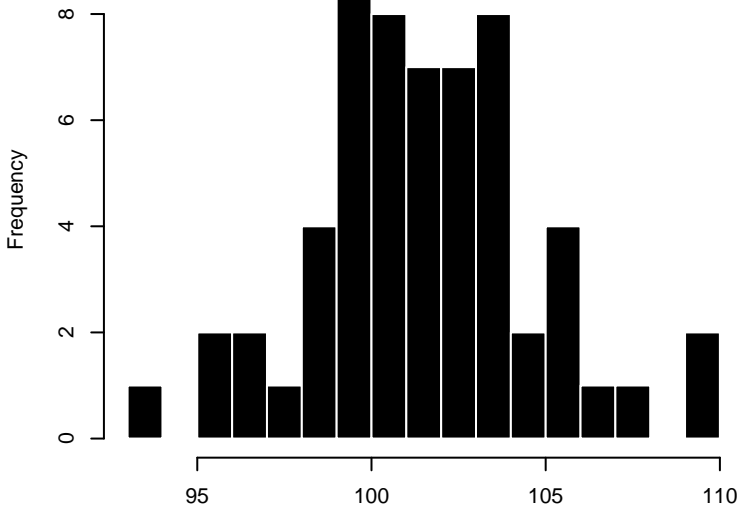**lambda 1.003**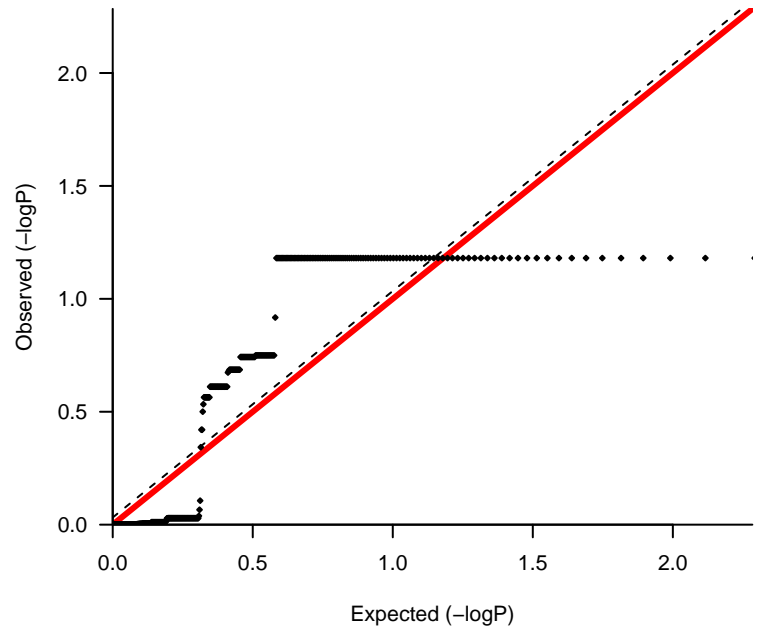**FT\_V3**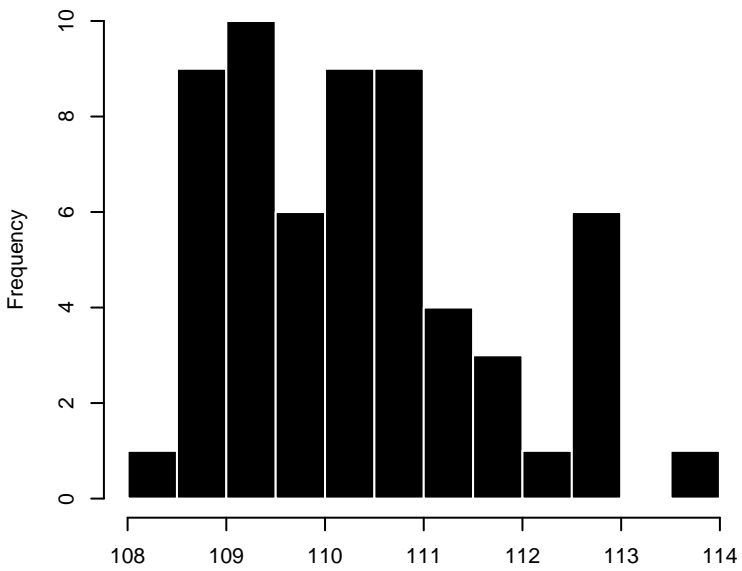**lambda 0.111**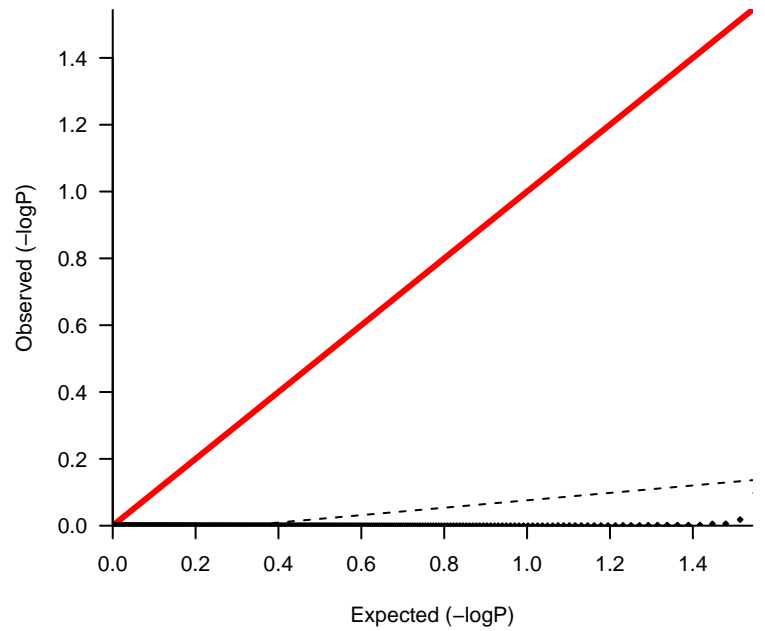**B\_V0**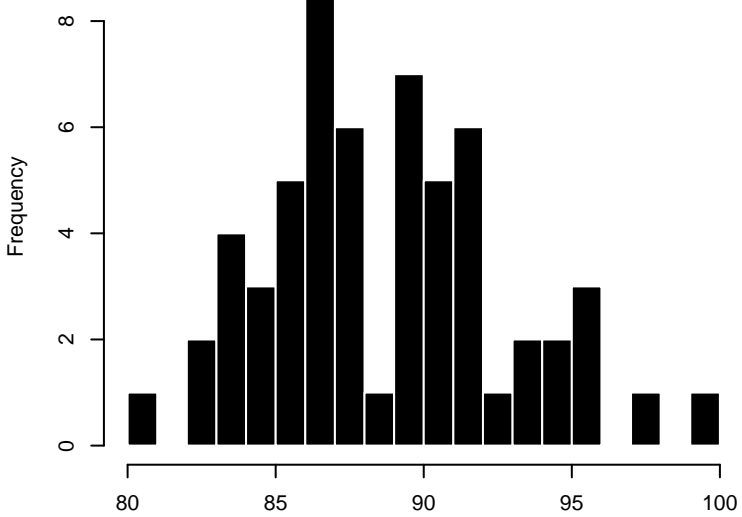**lambda 0.004**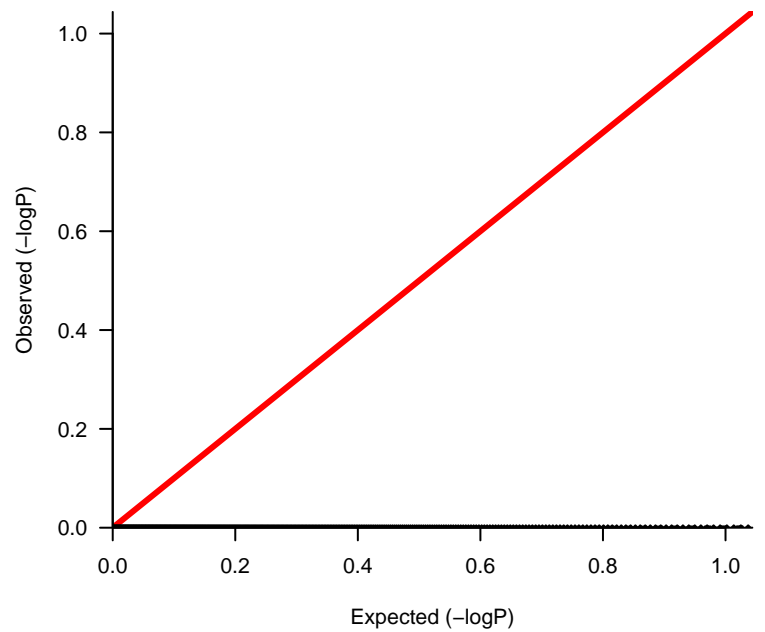

**B\_V1**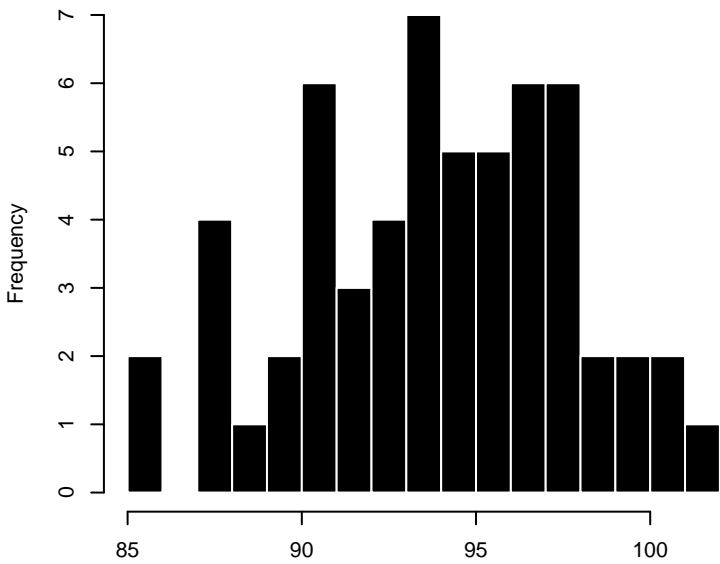**lambda 0.192**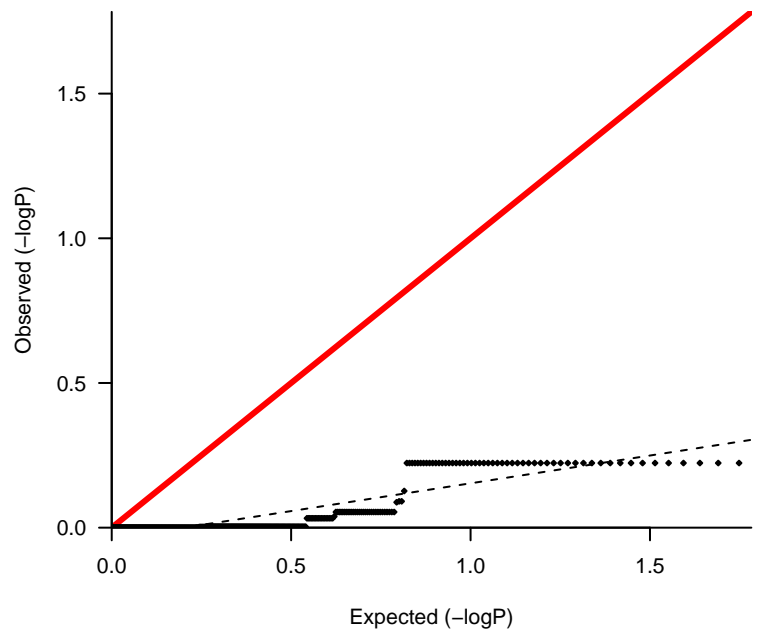**B\_V2**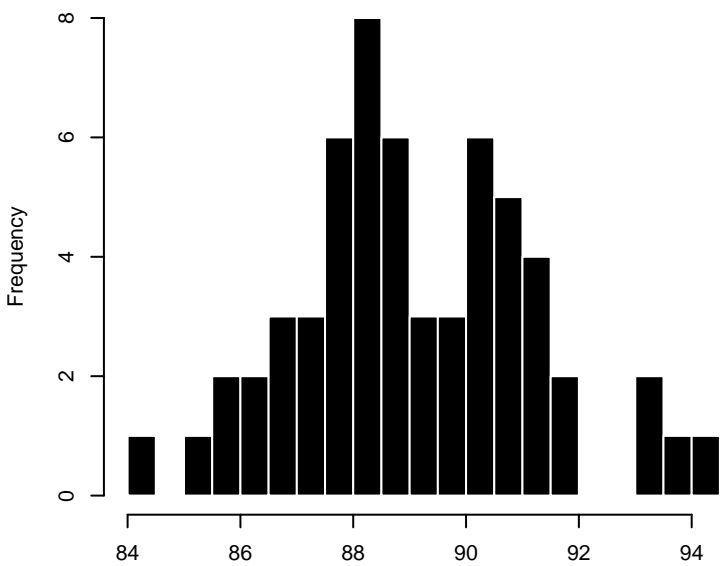**lambda 0.532**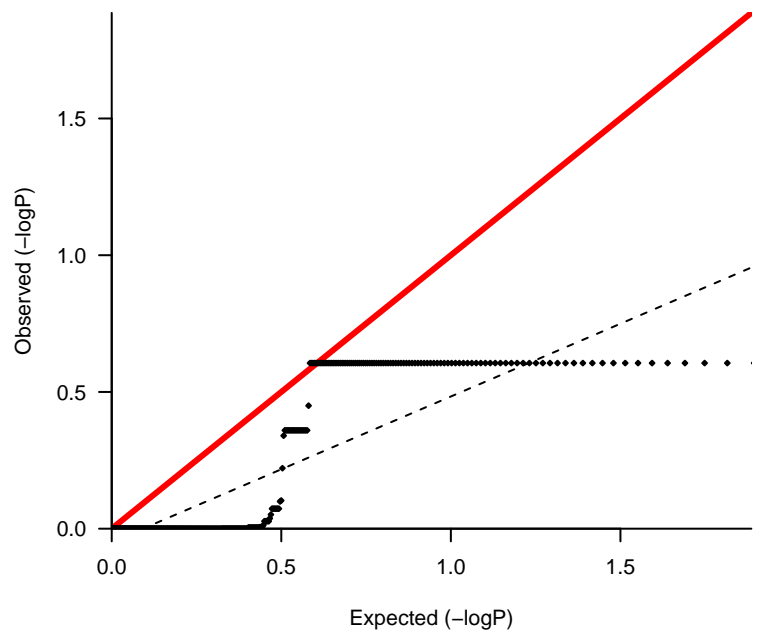**B\_V3**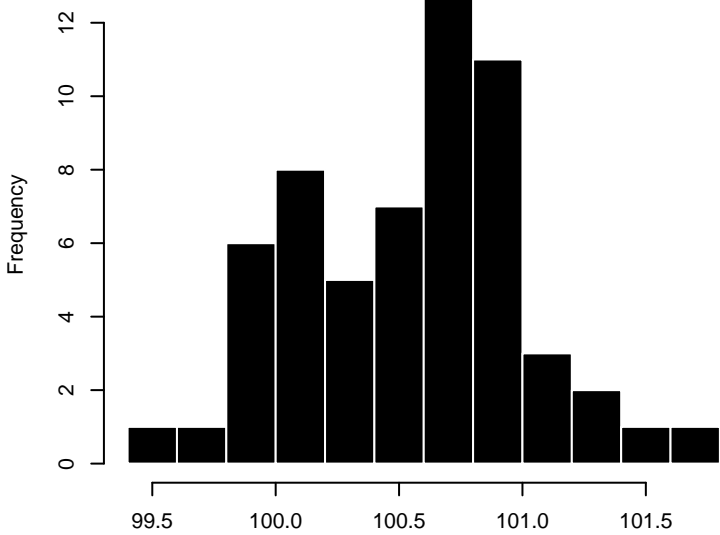**lambda 0.227**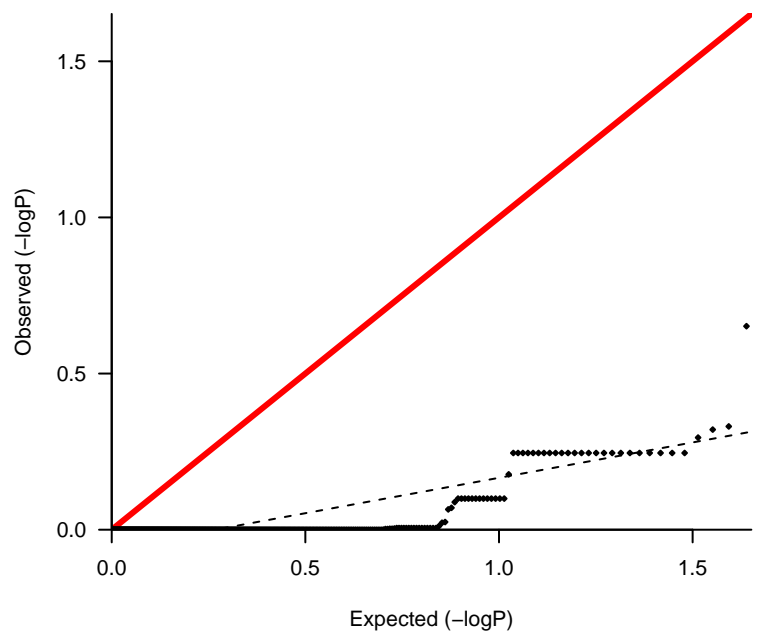





**bio1**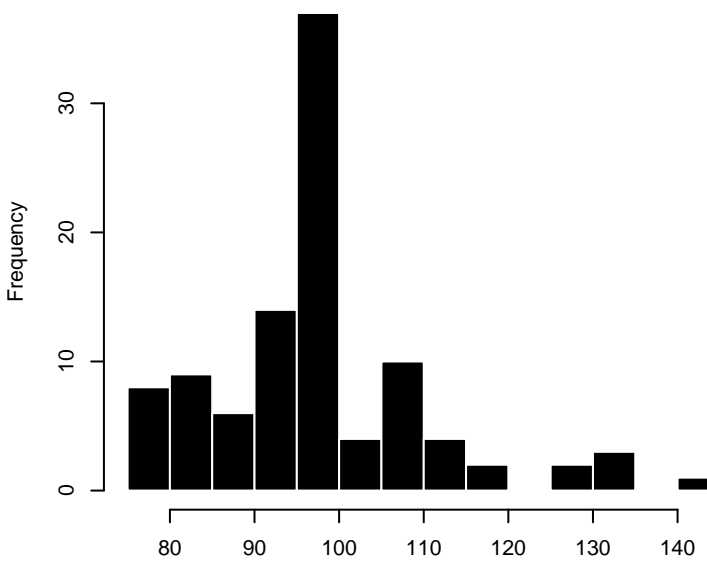**lambda 0.074**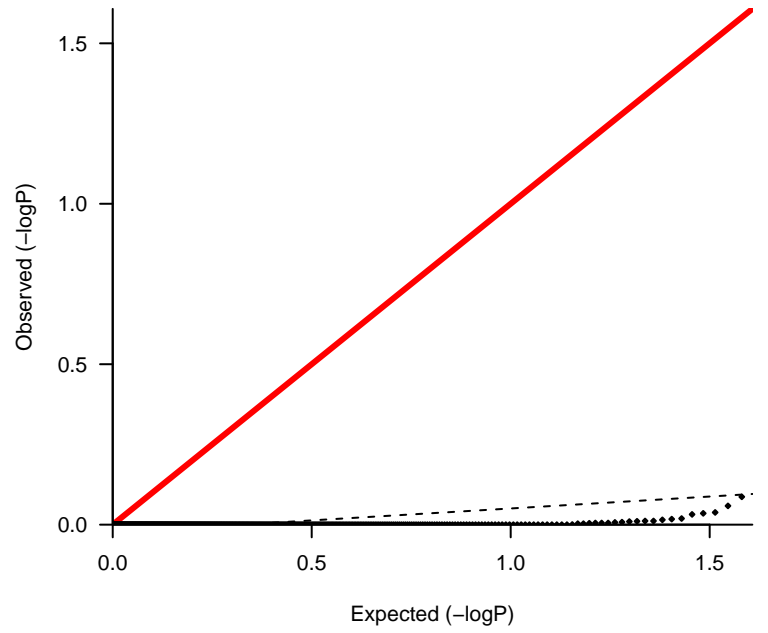**bio2**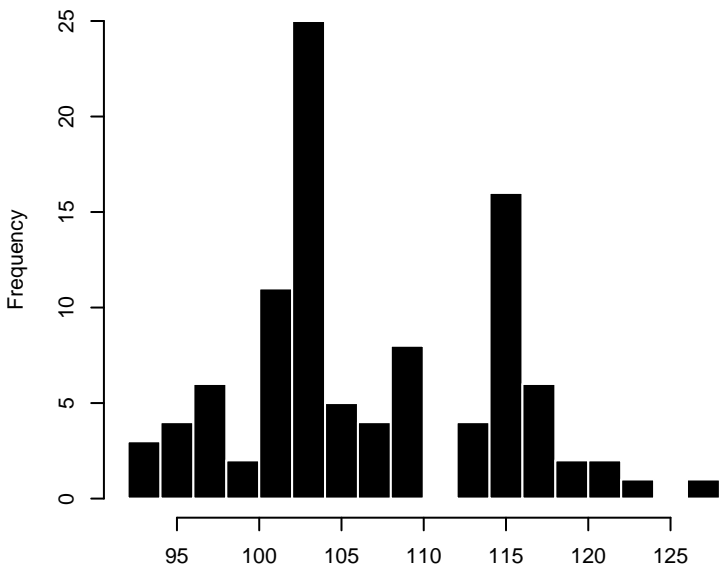**lambda 0.024**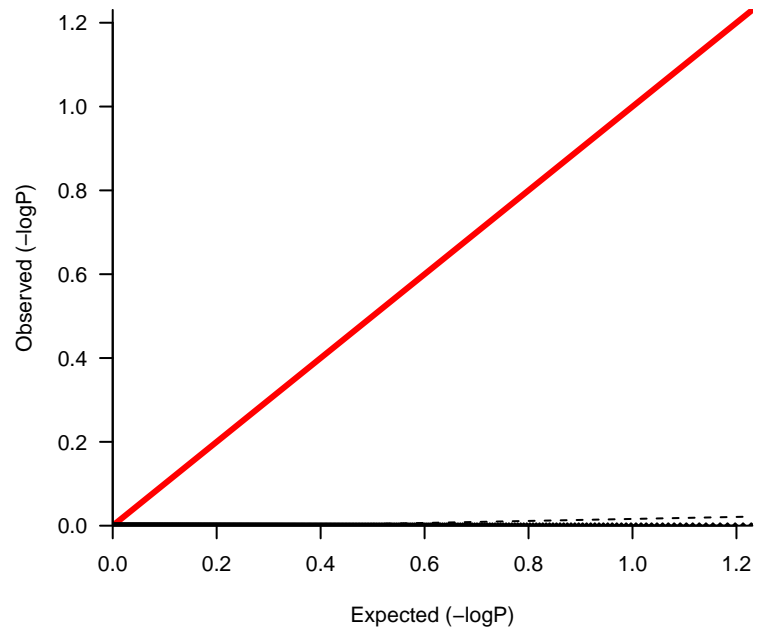**bio3**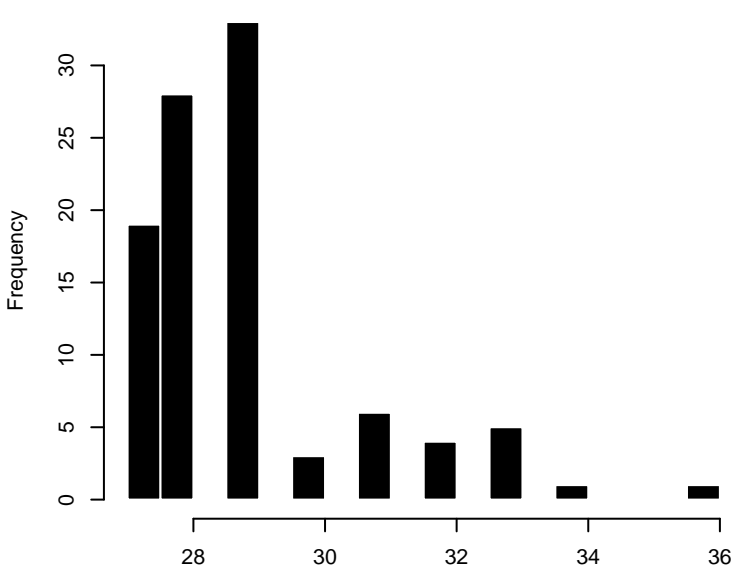**lambda 0.138**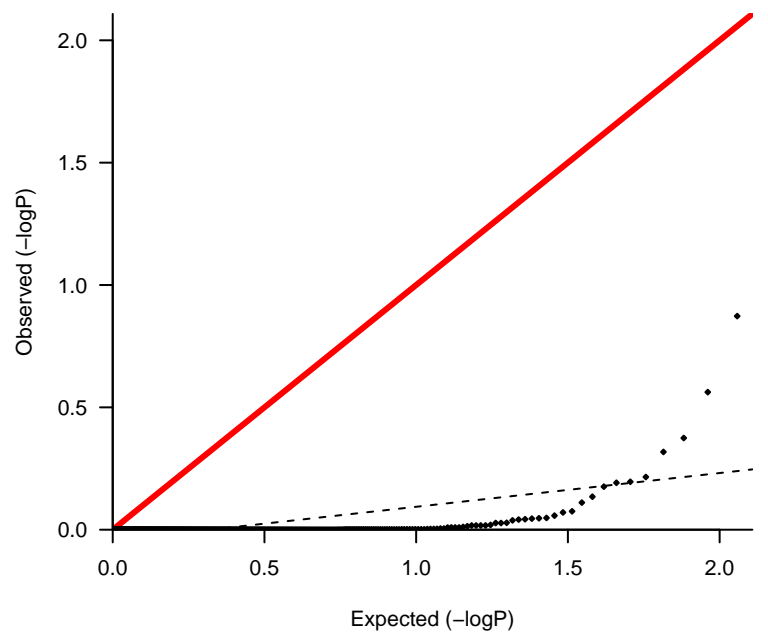

**bio4**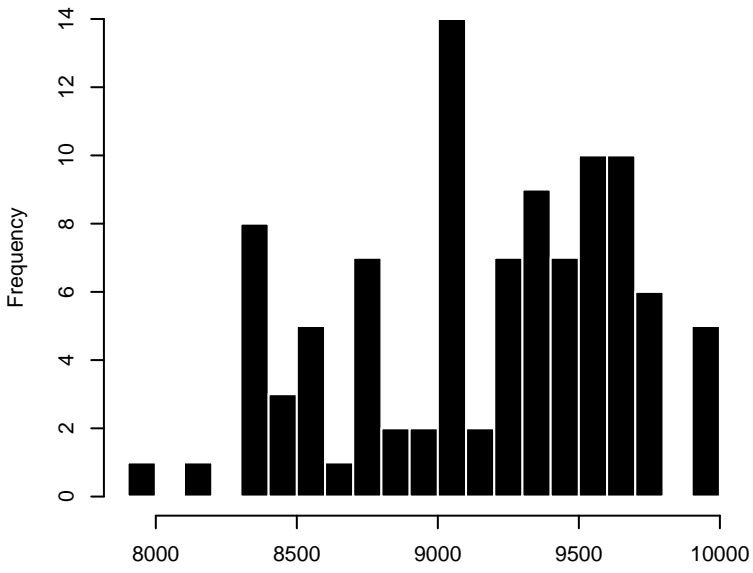**lambda 0.606**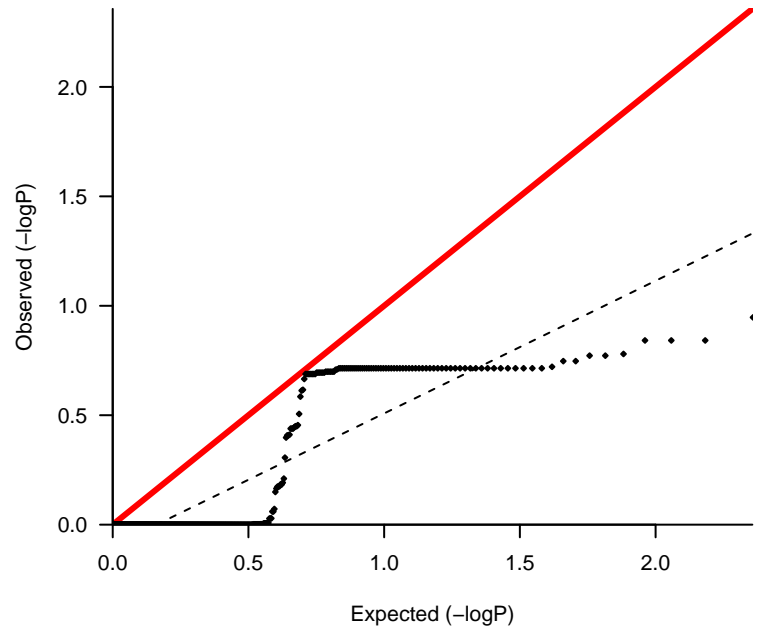**bio5**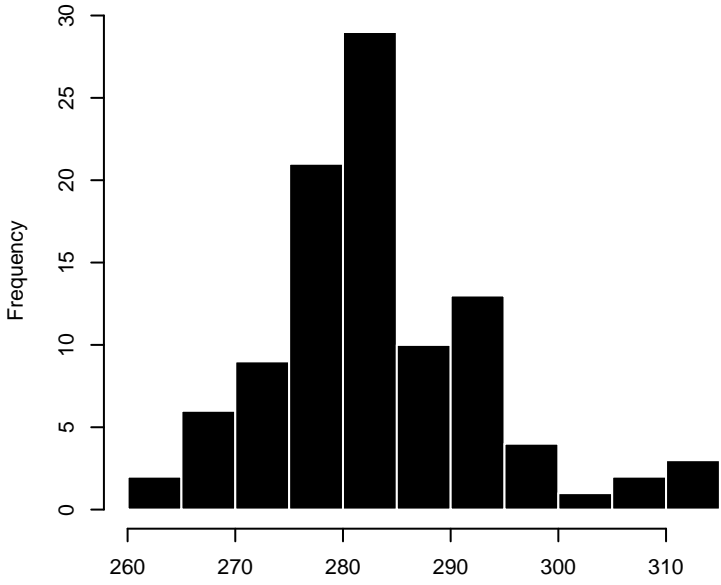**lambda 0.054**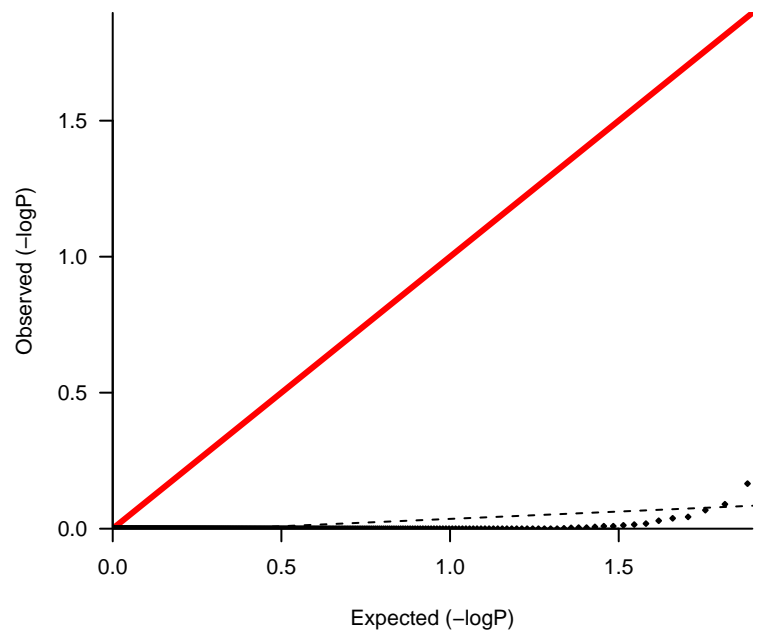**bio6**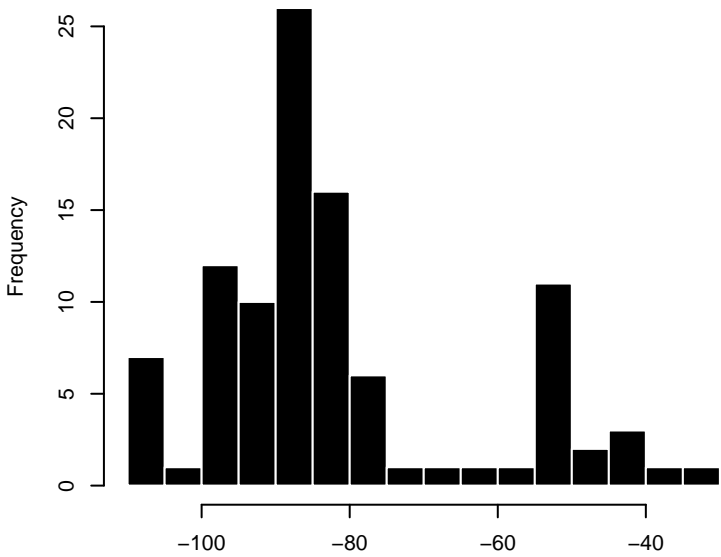**lambda 0.58**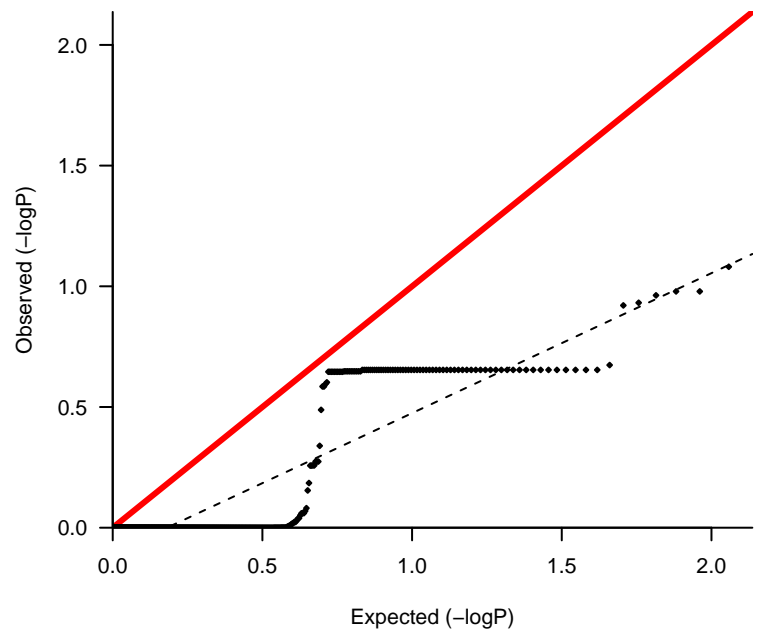

**bio7**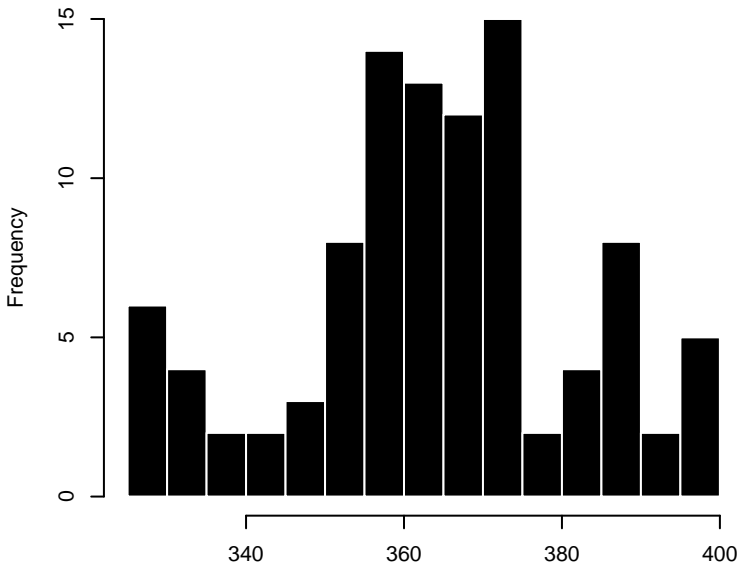**lambda 0.283**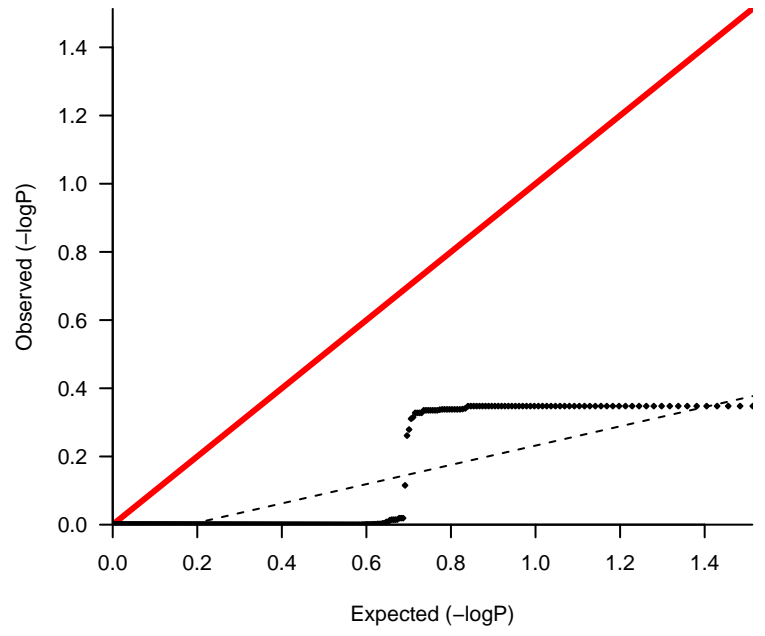**bio8**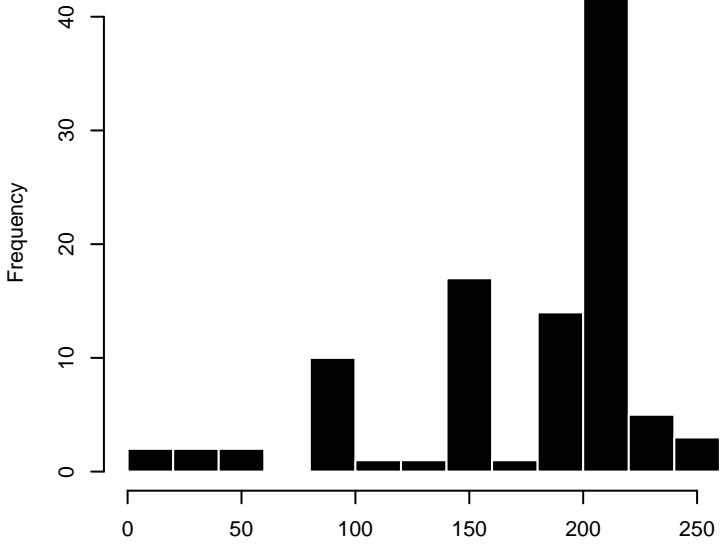**lambda 0.189**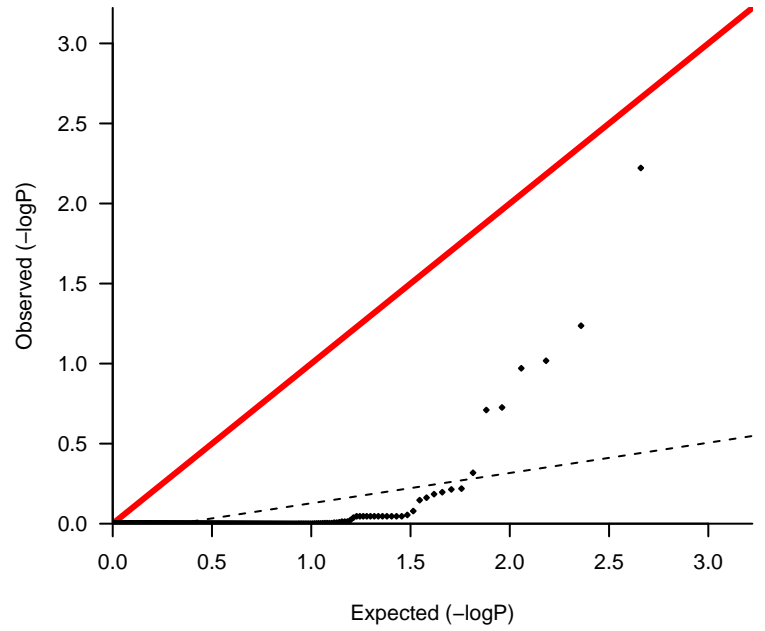**bio9**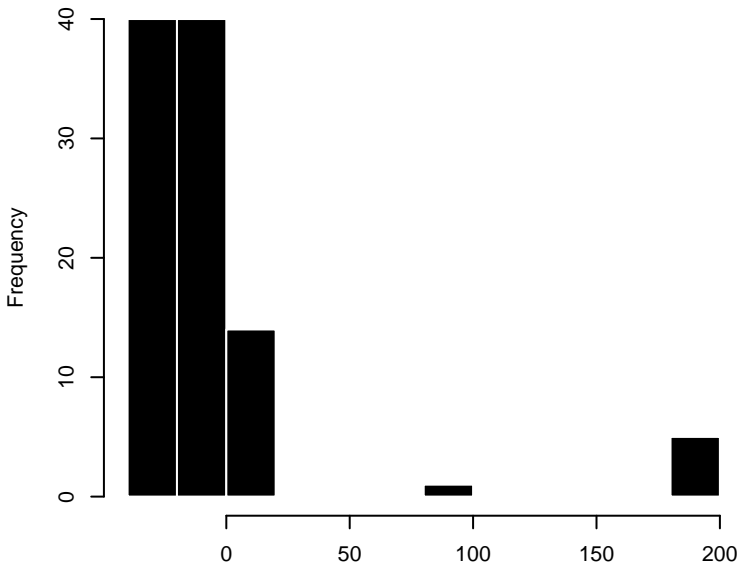**lambda 0.028**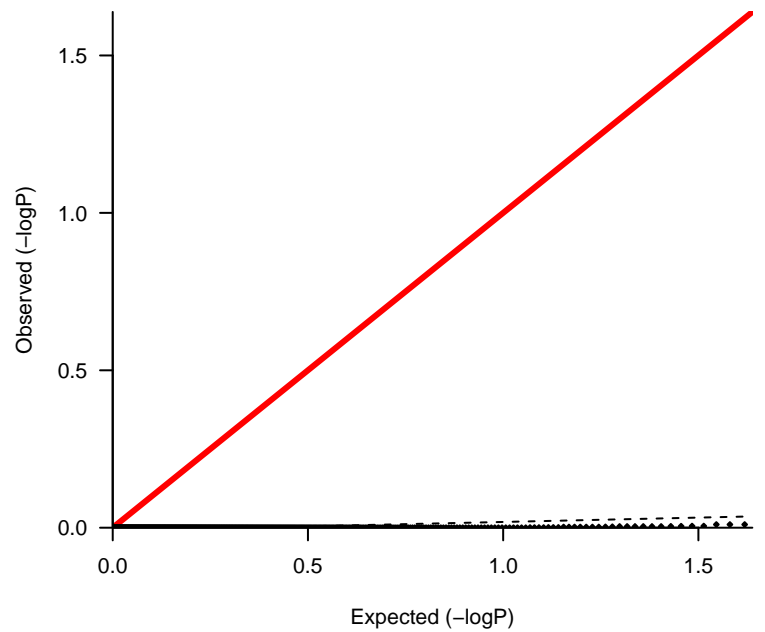

**bio10**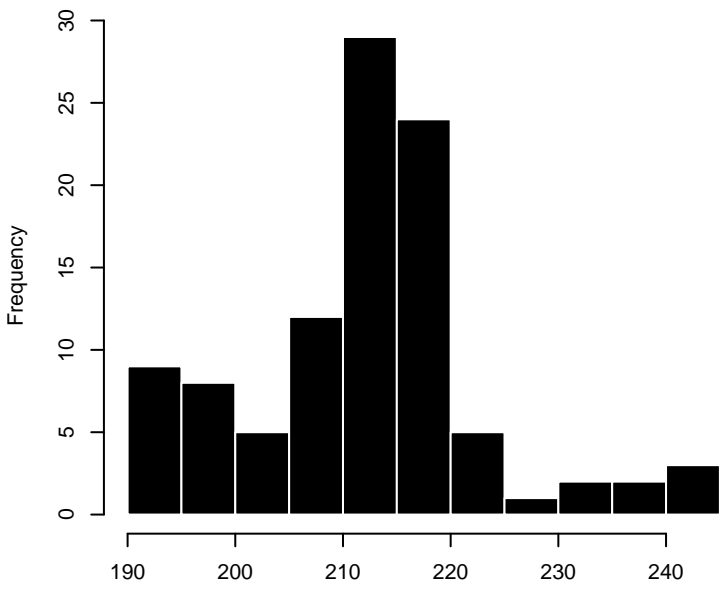**lambda 0.114**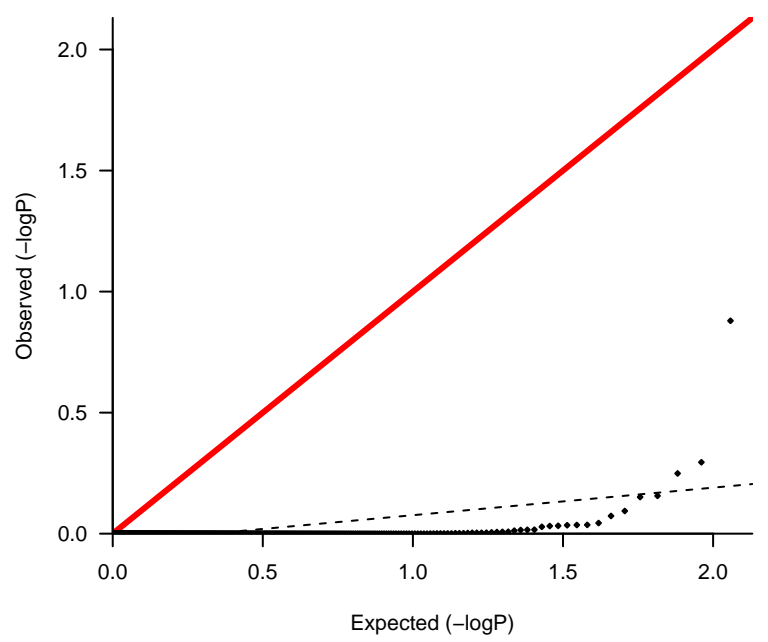**bio11**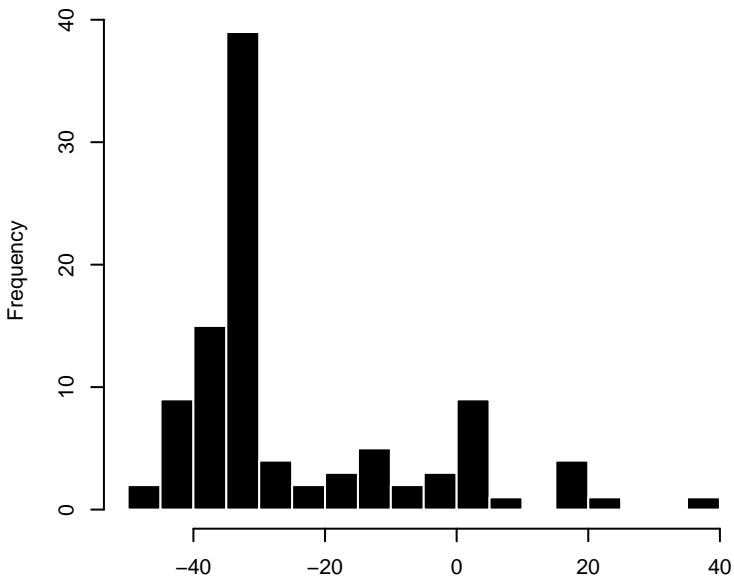**lambda 0.522**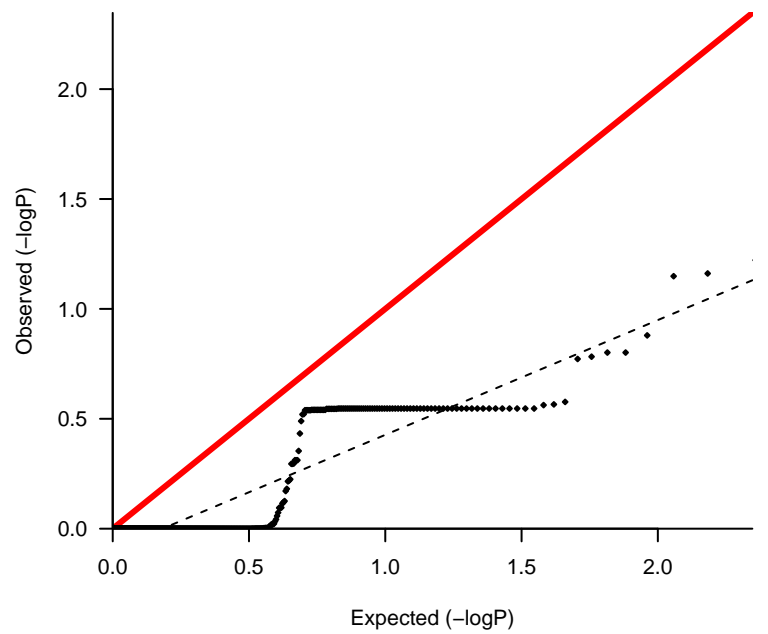**bio12**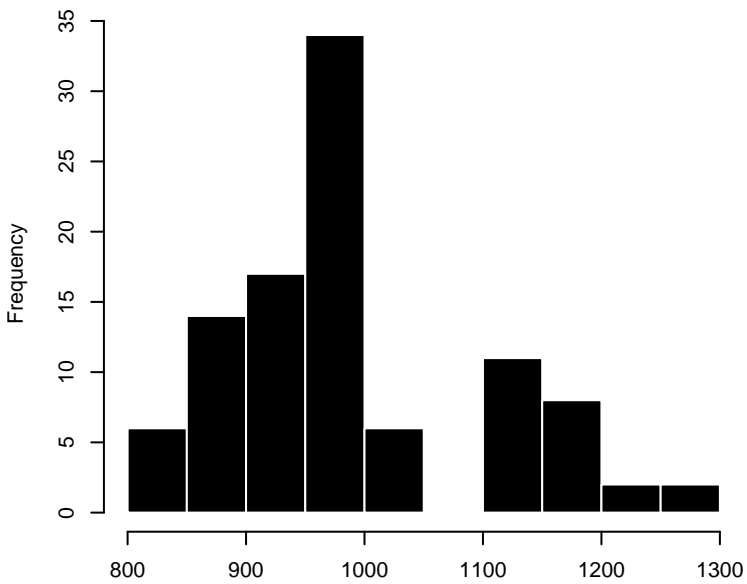**lambda 0.221**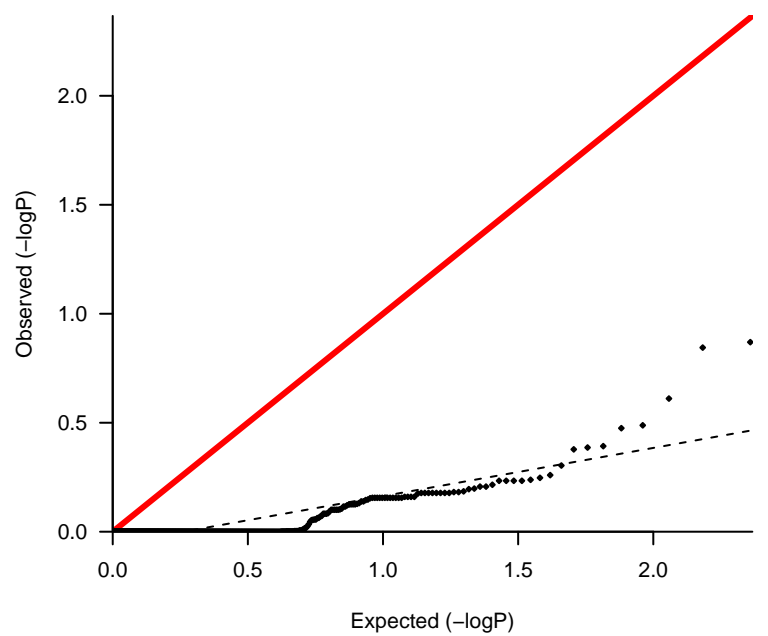

**bio13**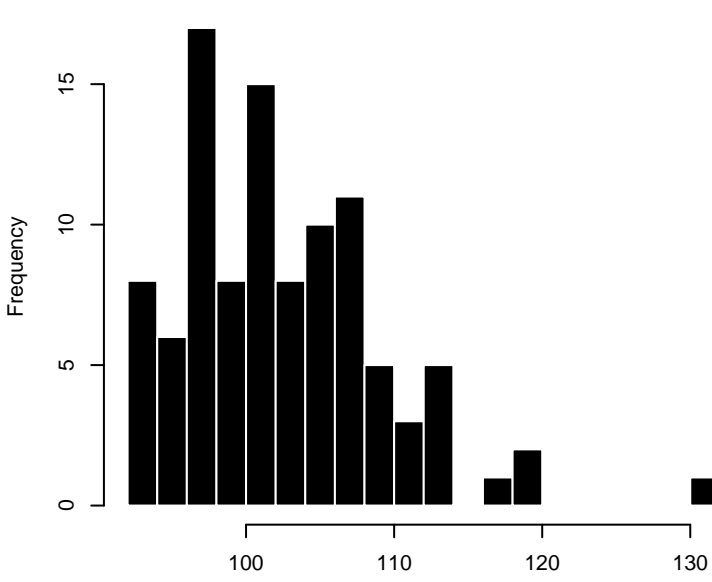**lambda 0.188**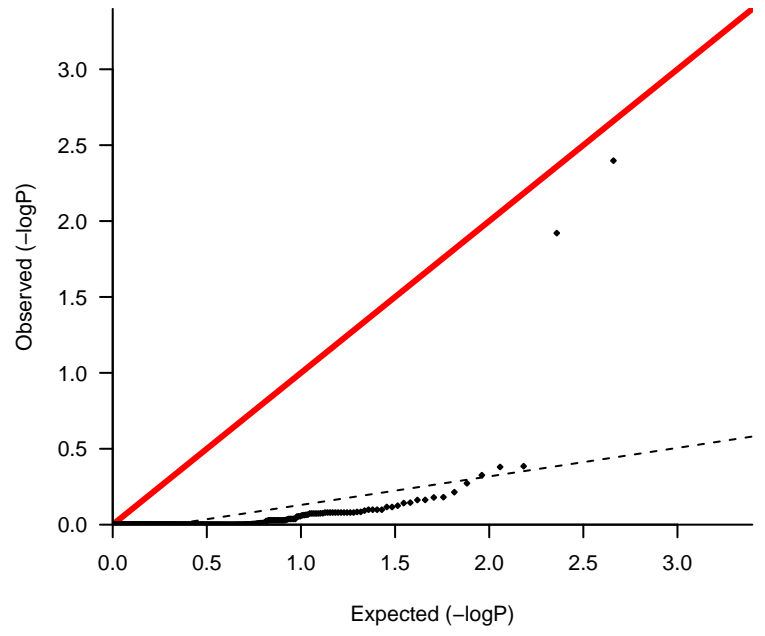**bio14**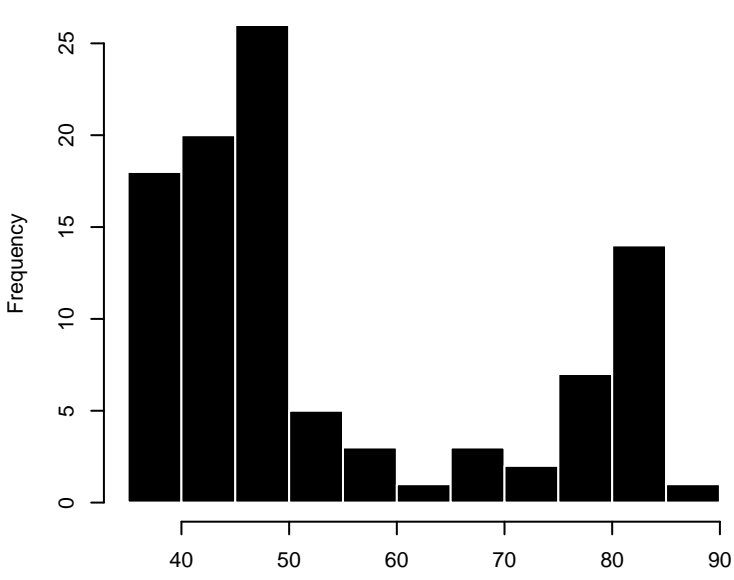**lambda 0.078**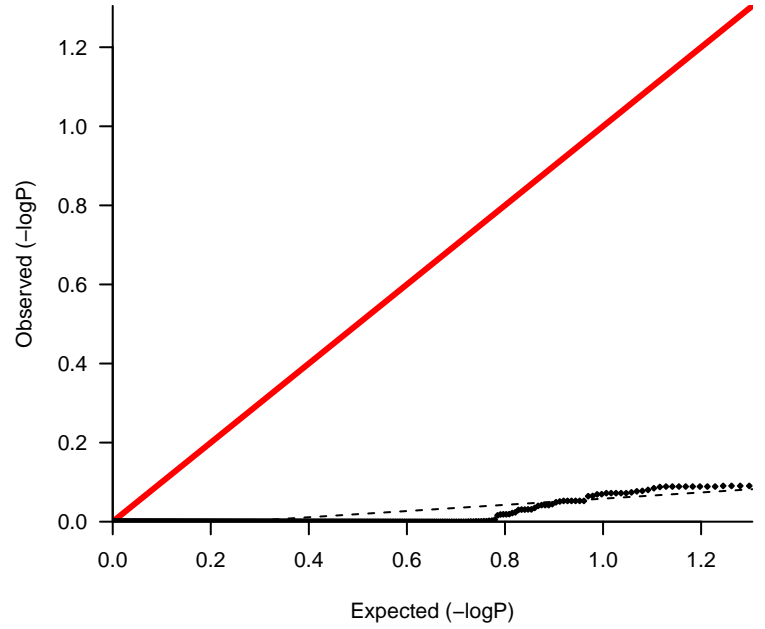**bio15**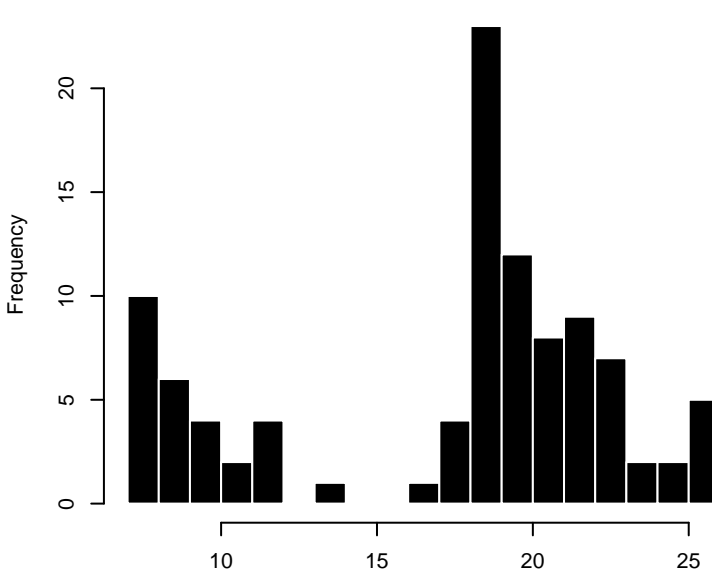**lambda 0.382**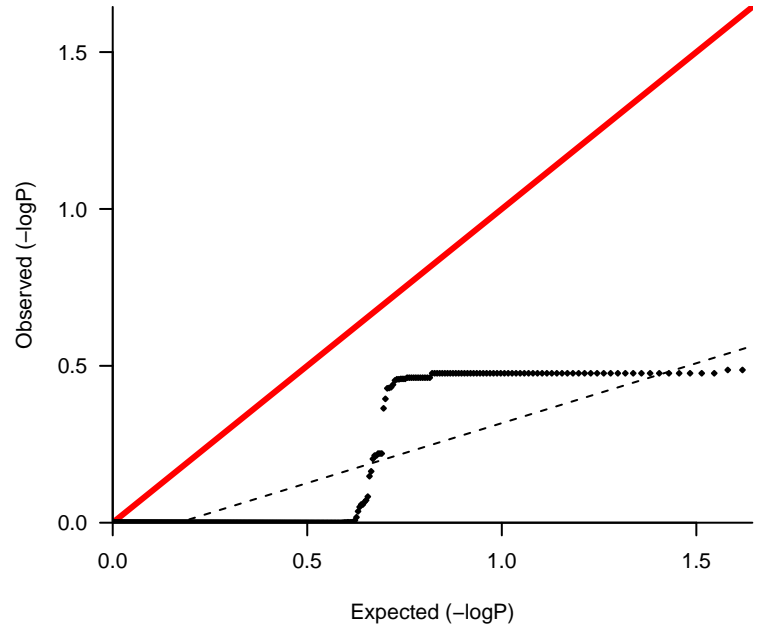

**bio16**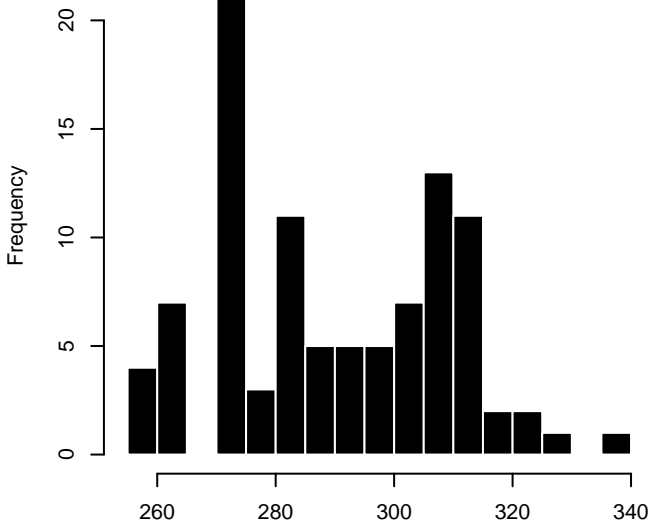**lambda 0.221**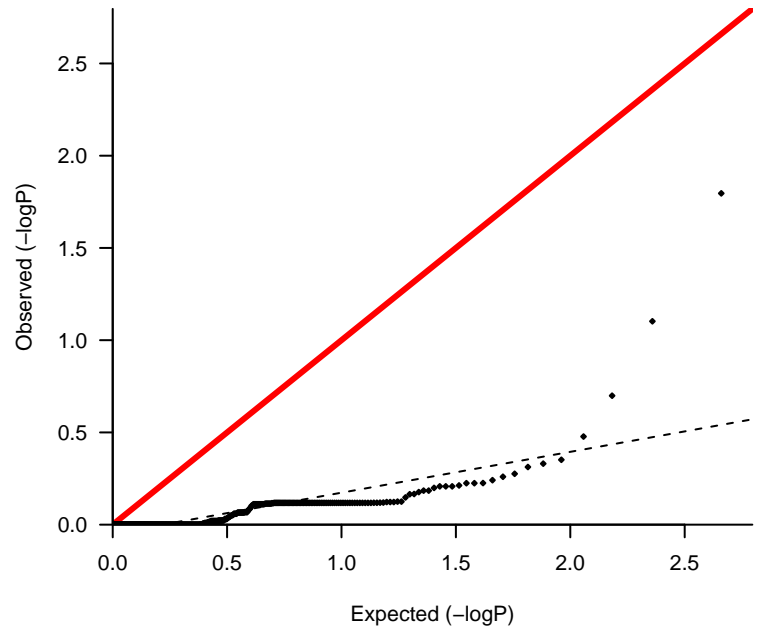**bio17**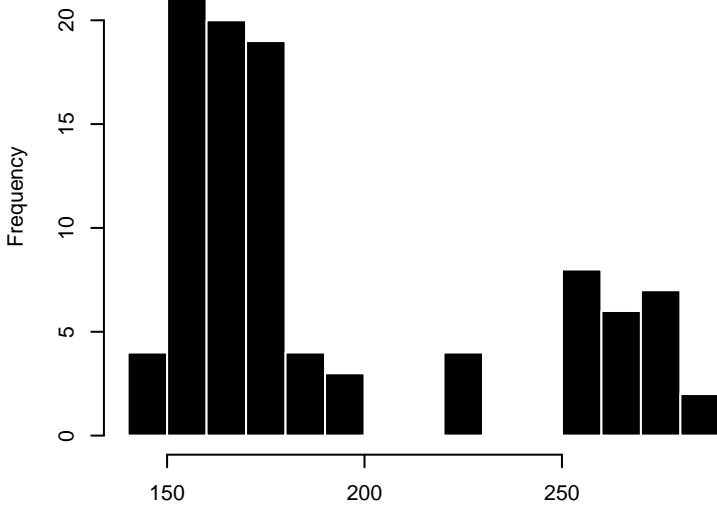**lambda 0.044**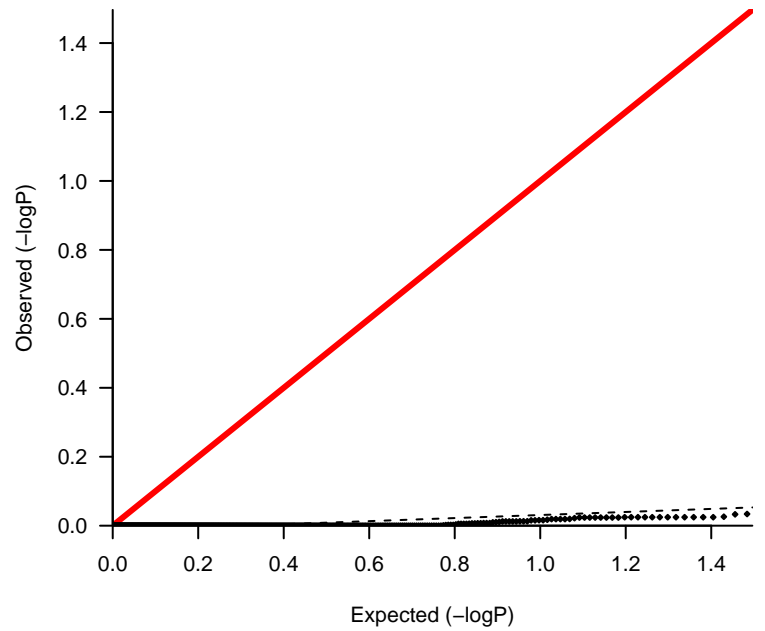**bio18**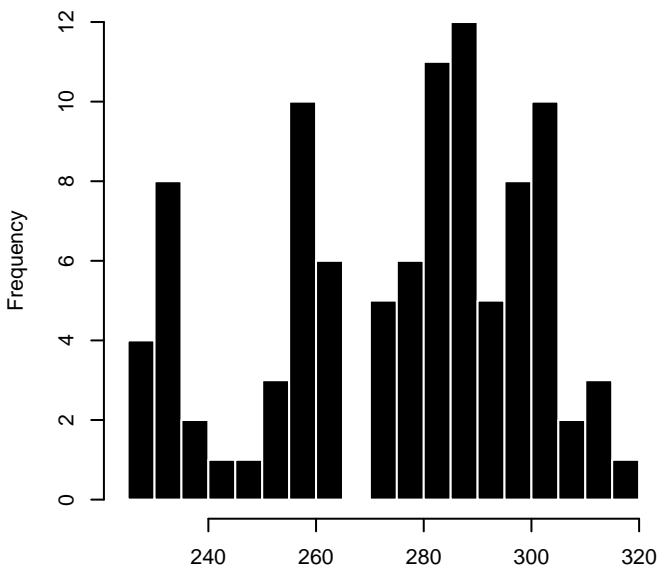**lambda 0.848**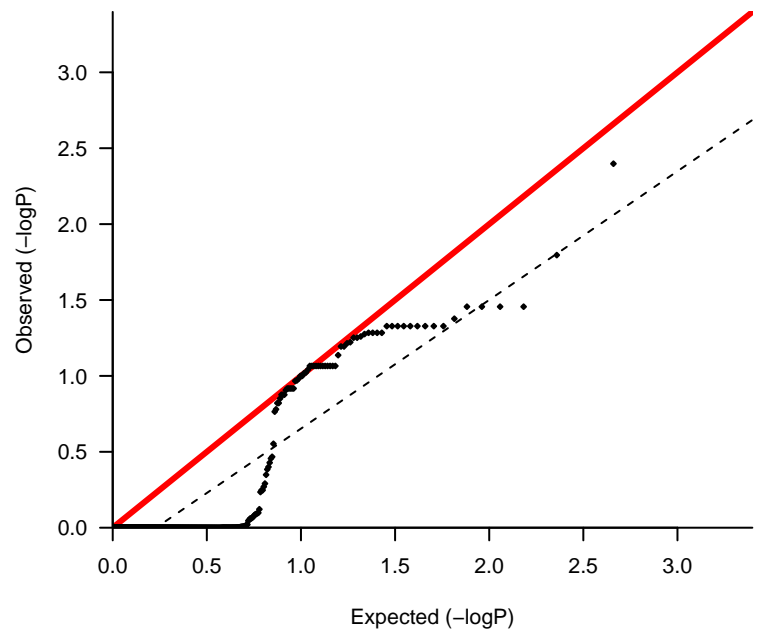

bio19

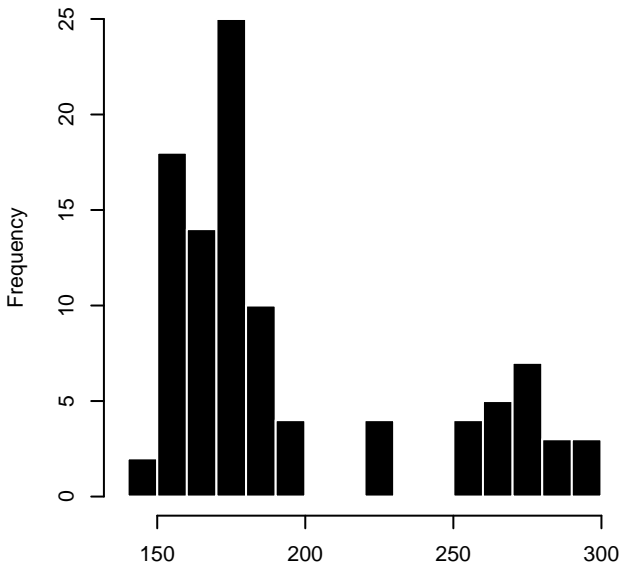

lambda 0.032

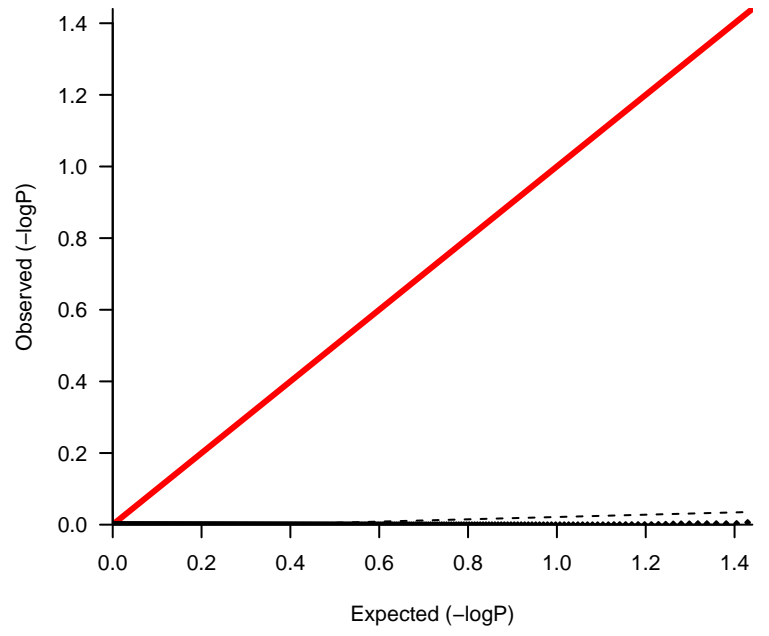

Supplement: pgen.1007155.s002.pdf [file pgen.1007155.s002.pdf]
