# Supplementary material for: The rate and potential relevance of new mutations in a colonizing plant lineage
Source: PubMed Central journal article supplement (PMC5825158; doi:10.1371/journal.pgen.1007155), 2018-02-12

**A**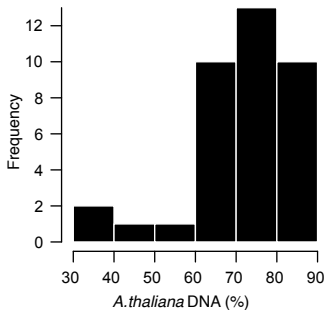**B**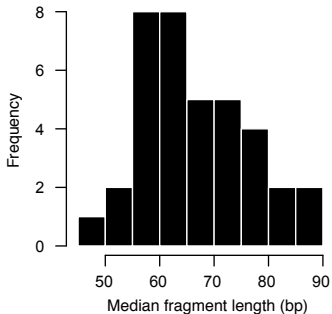**C**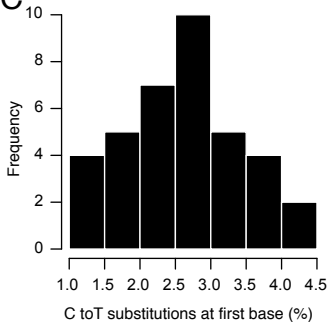**D**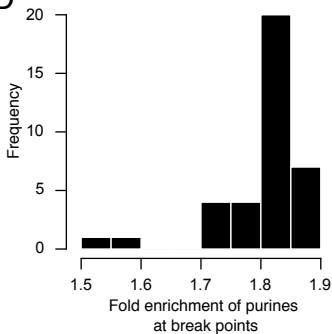

Supplement: pgen.1007155.s008.pdf [file pgen.1007155.s008.pdf]
