# Supplementary material for: The rate and potential relevance of new mutations in a colonizing plant lineage
Source: PubMed Central journal article supplement (PMC5825158; doi:10.1371/journal.pgen.1007155), 2018-02-12

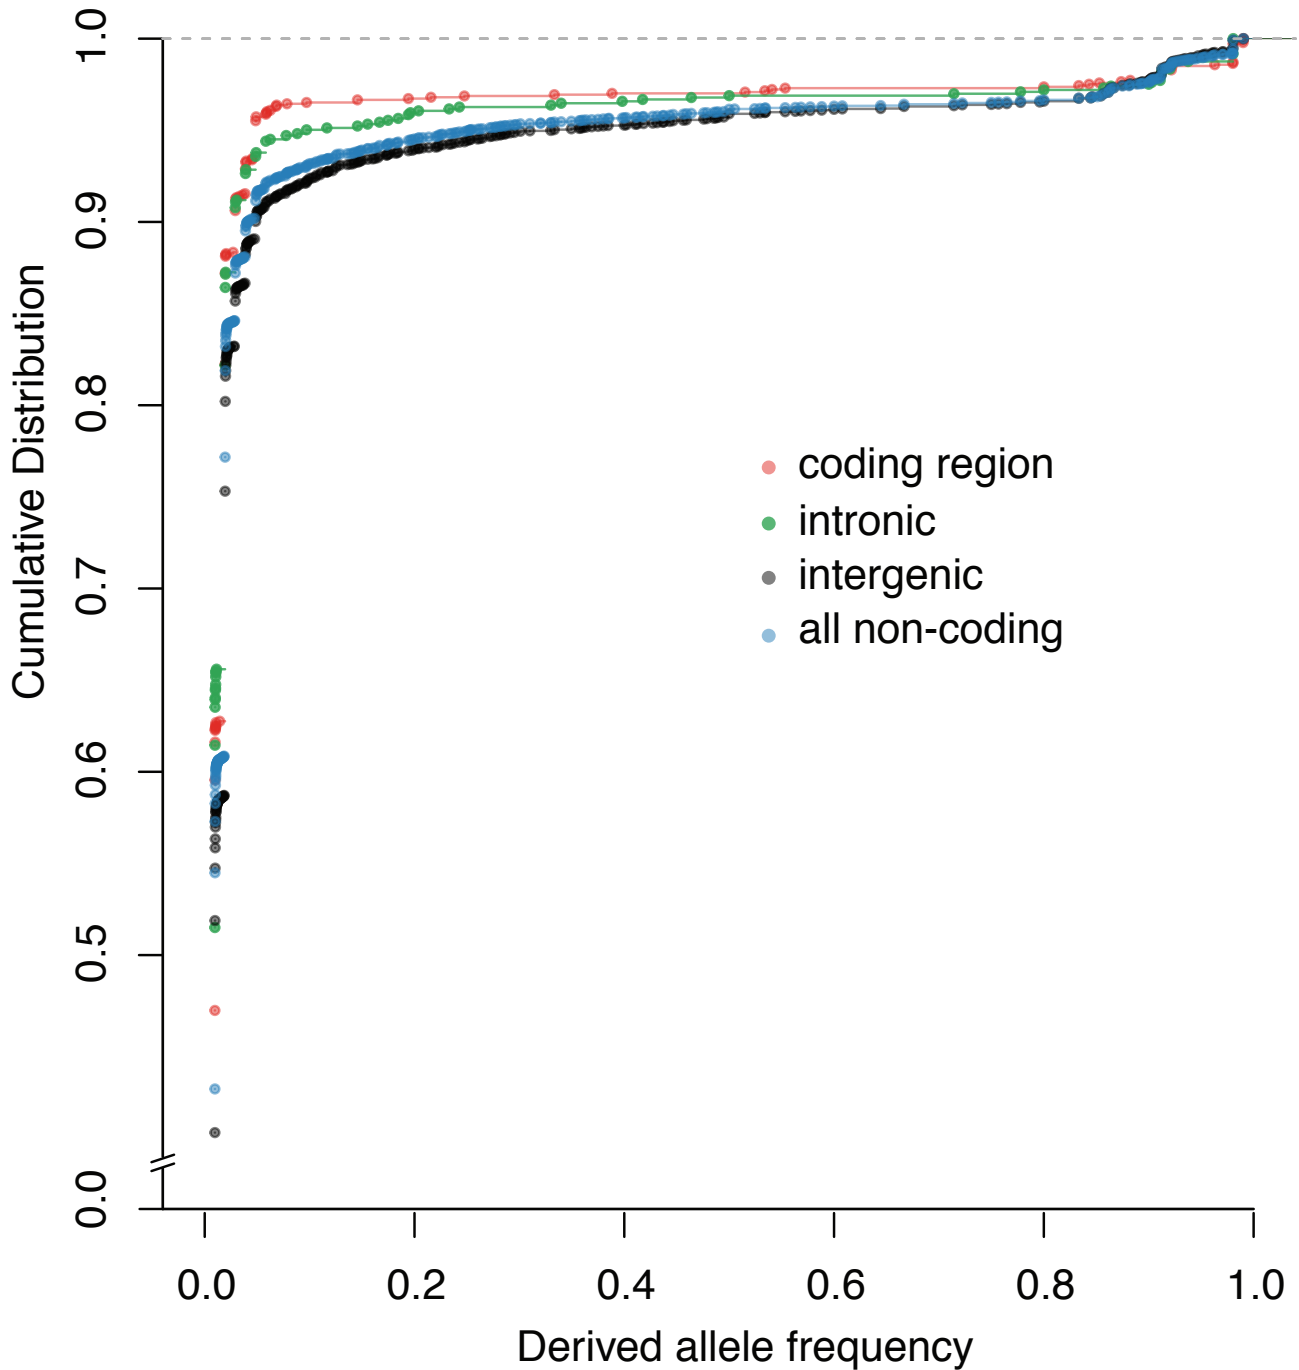

Supplement: pgen.1007155.s012.pdf [file pgen.1007155.s012.pdf]
